1 **Control of dynamic cell behaviors during angiogenesis and**  
2 **anastomosis by Rasip 1**

3

4 **Minkyung Lee<sup>1,3</sup>, Charles Betz<sup>1</sup>, Ilkka Paatero<sup>1,4</sup>, Niels Schellinx<sup>1</sup>, Jianmin Yin<sup>1</sup>,**  
5 **Christopher William Wilson<sup>2,5</sup>, Weilan Ye<sup>2</sup>, Markus Affolter<sup>1,\*</sup> and Heinz-Georg**  
6 **Belting<sup>1,\*</sup>**

7

8 <sup>1</sup> Department of Cell Biology, Biozentrum, University of Basel, Klingelbergstrasse 70,  
9 4056 Basel, Switzerland.

10 <sup>2</sup> Department of Molecular Biology, Genentech, Inc., South San Francisco, CA, USA.

11 <sup>3</sup> Current address: Department of Biosystems Science and Engineering, ETH Zurich,  
12 Mattenstrasse 26, 4058 Basel, Switzerland.

13 <sup>4</sup> Current address: Turku Centre for Biotechnology, University of Turku and Åbo  
14 Akademi University, Turku, 20520, Finland.

15 <sup>5</sup> Current address: Novartis Institutes for BioMedical Research, Cambridge, MA  
16 02139, USA

17

18 \*Correspondence: [markus.affolter@unibas.ch](mailto:markus.affolter@unibas.ch) (M.A.), [heinz-georg.belting@unibas.ch](mailto:heinz-georg.belting@unibas.ch)  
19 (H.-G.B.)

20

## 21 Abstract

22 Organ morphogenesis is driven by a wealth of tightly orchestrated cellular behaviors,  
23 which ensure proper organ assembly and function. Many of these cell activities involve  
24 cell-cell interactions and remodeling of the F-actin cytoskeleton. Here, we analyze the  
25 requirement for Rasip1 (Ras-interacting protein 1), an endothelial-specific regulator of  
26 junctional dynamics, during blood vessel formation. Phenotype analysis of *rasip1*  
27 mutants in zebrafish embryos reveal distinct requirements for Rasip1 during sprouting  
28 angiogenesis, vascular anastomosis and lumen formation. During angiogenic  
29 sprouting, Rasip1 is required for efficient cell pairing, which is essential for multicellular  
30 tube formation. High-resolution time-lapse analyses show that these cell pairing  
31 defects are caused by a destabilization of tricellular junctions suggesting that tri-  
32 cellular junctions may serve as a counterfort to tether sprouting endothelial cells during  
33 morphogenetic cell rearrangements. During anastomosis, Rasip1 is required to  
34 establish a stable apical membrane compartment; *rasip1* mutants display ectopic,  
35 reticulated junctions and the apical compartment is frequently collapsed. Loss of Ccm1  
36 and Heg1 function leads to junctional defects similar to those seen in *rasip1* mutants.  
37 Analysis of *radil-b* single and *rasip1/radil-b* double mutants reveal distinct and  
38 overlapping functions of both proteins. While Rasip1 and Radil-b have similar functions  
39 during angiogenic sprouting, the junction formation during anastomosis may primarily  
40 depend on Rasip1.

41

## 42 Keywords

43 Zebrafish, Endothelial cells, Angiogenesis, Anastomosis, VE-cadherin, Rasip1

## 44 Introduction

45

46 The cardiovascular system is the first organ to become functional during embryonic  
47 development. The generation of vascular networks is essential for developmental  
48 patterning, growth and survival of the vertebrate embryo. As the embryo grows, the  
49 vasculature adjusts to the increasing demand of nutrients and oxygen by an expansion  
50 of the vasculature tree via sprouting angiogenesis, vascular remodeling and  
51 adaptation of blood vessel diameter. Vascular morphogenesis is driven by a wealth of  
52 dynamic cellular behaviors, which are regulated by molecular as well as physical cues,  
53 and are characterized by an extraordinary plasticity (Adams and Alitalo, 2007;  
54 Baeyens et al., 2016; Duran et al., 2017). At the cellular level, blood vessel  
55 morphogenesis and remodeling are accomplished by endothelial cell behaviors  
56 including cell migration, cell rearrangement and cell shape changes (Betz et al., 2016).  
57 This repertoire of dynamic behaviors allows endothelial cells to rapidly respond to  
58 different contextual cues, for example during angiogenic sprouting, anastomosis,  
59 pruning, diapedesis or regeneration.

60 Previous studies have shown that vascular tube formation requires extensive and  
61 diverse cell shape changes and that these changes can be driven by junctional  
62 remodeling as well as dynamic regulation of the cortical actin cytoskeleton (Gebala et  
63 al., 2016; Paatero et al., 2018; Phng et al., 2015; Sauter et al., 2014). Junctional  
64 remodeling is essential for cell rearrangements, which drive multicellular tube  
65 formation. Enlargement of the luminal space, on the other hand, requires apical  
66 membrane invagination (Barry et al., 2016; StriliC et al., 2009). During anastomosis,  
67 the apical membrane can invaginate through the entire cell leading to the formation of  
68 a unicellular tube (Lenard et al., 2013).

69 Junctional remodeling and membrane invagination rely on the dynamic regulation of  
70 the F-actin cytoskeleton at the endothelial cell junction and apical cortex, respectively.  
71 Small GTPases of the Rho family, including Cdc42, Rac1 and RhoA are essential  
72 regulators of F-actin dynamics and have been shown to play critical roles during blood  
73 vessel formation *in vitro* and *in vivo* (reviewed by (Barlow and Cleaver, 2019). In the  
74 vasculature, these GTPases are partially regulated by the adaptor protein Rasip1.  
75 Rasip1 has been shown to promote Rac1 and Cdc42 activity, whereas it inhibits RhoA  
76 activity by binding to the GTPase activating protein Arhgap29 (Barry et al., 2016; Xu  
77 et al., 2011). Ablation of Rasip1 in mice and knock-down of *rasip1* zebrafish cause  
78 severe vascular defects (Wilson et al., 2013; Xu et al., 2011). During vasculogenesis,  
79 Rasip1 is required for the lumenization of the dorsal aorta, in particular for the clearing  
80 of apical membrane compartments from junctional proteins and for the opening of the  
81 vascular lumen between endothelial cells (Barry et al., 2016). However, the role of  
82 Rasip1 during sprouting angiogenesis and anastomosis has not been studied in detail.  
83 To gain more insight into the cellular and molecular mechanisms of vascular tube  
84 formation during angiogenesis, we have generated loss-of-function alleles in the  
85 zebrafish *rasip1* gene and performed high-resolution time-lapse imaging to observe  
86 junctional dynamics during sprouting angiogenesis and anastomosis. Loss of *rasip1*  
87 causes multiple vascular defects, with respect to angiogenic sprouting, including  
88 defects in cell proliferation, junctional stability and lumen formation. Furthermore,  
89 analyses of *radil-b* and *rasip1;radilb* double mutants reveal partly redundant roles for  
90 the two proteins. Lastly, knock-down of *ccm1* and *heg1* phenocopies the apical  
91 junctional defects seen in *rasip1*, suggesting a functional interaction between the  
92 proteins during blood vessel formation.

## 93 Results

94

### 95 **Loss of Rasip1 function causes broad vascular defects**

96 To investigate the role of Rasip1 in vascular morphogenesis we employed  
97 CRISPR/Cas9 technology to generate several mutant alleles, namely *rasip1<sup>ubs23</sup>*,  
98 *rasip1<sup>ubs24</sup>* and *rasip1<sup>ubs28</sup>*, respectively (S-Figure 1). The *rasip1<sup>ubs28</sup>* allele comprises  
99 a deletion of about 35kb including the *rasip1* coding region from exon 3 to 16, encoding  
100 a severely truncated protein lacking the Ras-association, Forkhead-association and  
101 Dilute domains (Figure 1a). Since the truncated protein lacks all the conserved  
102 domains, we consider *rasip1<sup>ubs28</sup>* to be a null-allele and focused our studies on the  
103 analysis of this mutant.

104 Homozygous *rasip1* mutants displayed hemorrhages and vascular instability in the  
105 cranial vasculature at 3 days of development (Figure 1b,c). Furthermore, we observed  
106 transient pericardial edema between 3 and 5 dpf (Figure 1d), which usually  
107 disappeared during larval development. In the trunk, *rasip1* mutants showed reduced  
108 blood flow, which correlated with irregular and generally reduced diameter of the  
109 dorsal aorta (DA) and intersegmental vessels (ISVs) (Figure 1e-g). These differences  
110 were transient and by 5 dpf the average vessel diameter had recovered to normal size.  
111 Despite these severe defects, homozygous *rasip1* mutants recovered and about 30%  
112 of them developed to fertility.

113

### 114 **Reduced motility and proliferation during angiogenic sprouting in *rasip1*** 115 **mutants**

116 To find out whether the loss of *rasip1* may affect dynamic cell behaviors, we performed  
117 time-lapse analyses, concentrating on the developing ISVs. ISVs sprouts emerge from

118 the DA at about 22-24 hpf and extend towards the dorsal side of the embryo. In wild-  
119 type embryos, they reach the dorsal part of the neural tube by 28 hpf and initiate  
120 formation of the dorsal longitudinal anastomotic vessel (DLAV) (Lawson and  
121 Weinstein, 2002). In our time-lapse movies we observed that by 30 hpf almost all  
122 sprouts in the trunk region had completed dorsal sprouting and engaged in contact  
123 with neighboring sprouts (S-Figure 2a, b). In contrast, ISV sprouting in *rasip1* mutants  
124 appeared sluggish and 25% of sprouts were incomplete by 30 hpf (S-Figure 2a,b). To  
125 see whether stunted outgrowth was reflected by a difference in the number of  
126 endothelial cells contributing to ISV sprouts, we counted nuclei within each sprout at  
127 30 hpf (S-Figure 2c). In wild-type and *rasip1* mutants, the number ISV nuclei was quite  
128 variable ranging between one and five. However, we observed a clear enrichment of  
129 ISVs containing one or two nuclei in mutants when compared to wild-type, which  
130 contained three to four nuclei. To differentiate whether this diminished cell number  
131 was caused either by reduced recruitment or by proliferation defects of endothelial  
132 cells, we tracked endothelial cell nuclei during ISV formation (S-Figure 2d-g). In wild-  
133 type siblings, we observed that two cells migrated from the DA into the sprout,  
134 undergoing one round of division each thus giving rise to an ISV consisting of four  
135 cells (S-Figure 2e); ISVs comprising three cells were usually formed by two migrating  
136 cells and a single cell division (S-Figure 2f). In *rasip1* mutants we rarely observed cell  
137 divisions within the sprouts (S-Figure 2d,g). Instead, most cells in the sprout originated  
138 from the DA and occasionally we observed three cells migrating into the sprout (Figure  
139 2f). Hence, these results show that proliferation in sprouting endothelial cells is  
140 reduced in *rasip1* mutants and suggest that paucity of cell number may partially be  
141 compensated by the recruitment of additional cells into the sprout.

142

## 143 **Instability of tricellular junctions inhibits formation of multicellular tubes**

144 We next examined whether loss of *rasip1* affects angiogenic tube formation. In wild-  
145 type embryos, the multicellular architecture of ISVs tubes is established via concerted  
146 migratory and proliferative activities of endothelial cells. More specifically, the  
147 multicellular configuration is driven by junctional rearrangements along the vessel axis,  
148 which leads to effective cell pairing and thus multicellularity.

149 Since multicellular tubes are characterized and can be recognized by continuous  
150 junctions along the blood vessel axis (Blum et al., 2008), we used a *ve-cad:ve-cad-*  
151 *Venus* reporter (Legendijk et al., 2017) to follow the dynamics of endothelial junctions  
152 during ISV formation. In wild-type siblings, cell junctions elongated and spanned the  
153 entire extend of the ISV giving rise to multicellular tubes by 48 hpf (Figure 2a,b,f).  
154 Notably, adherens junctions maintained the continuity of the ISVs with the DA, where  
155 they formed vertices or tri-cellular junctions (Figure 2a, white arrowheads). *rasip1*  
156 mutants showed a clear delay in multicellular tube formation (Figure 2c) and at 48 hpf  
157 – on average – about 40% of ISVs had not achieved a multicellular configuration  
158 (Figure 2b). Moreover, time-lapse analysis of VE-cad-Venus showed defects in  
159 junctional development (Figure 2a). Specifically, at the ventral base of the sprout,  
160 junctions that were normally tethered to the DA in wild-type embryos, lost this  
161 attachment and the junctional ring was “released” in mutant embryos (Figure 2a,  
162 yellow arrowheads,d). This detachment resulted in one of the stalk cells moving up  
163 into the DLAV leaving a single cell spanning the distance between the DA and the  
164 DLAV (Figure 2a,e,f). These results indicate that junctional interconnections at the  
165 base of the sprout are critical for cell intercalation to occur during multicellular tube  
166 formation. Thus, the loss of these connections in *rasip1* mutant prevents cell pairing

167 and results in unicellular ISVs and consequently a defect in the cord hollowing process  
168 underlying multicellular tube formation.

169

### 170 **Defects in junctional dynamics during blood vessel anastomosis**

171 The growth and interconnection of vascular networks requires angiogenic sprouting  
172 as well as the interconnection of all sprout by the process of anastomosis. At the  
173 cellular level, anastomosis occurs in a quite stereotyped fashion (reviewed by (Betz et  
174 al., 2016). Neighboring sprouts initiate contact via tip cell filopodia and form a  
175 junctional ring which surrounds apically polarized membrane. Junctional ring and  
176 apical membrane formation in both of the contacting cells leads to the formation of a  
177 luminal pocket, which is later connected to the lumen of the nascent vessel. The  
178 process of anastomosis in zebrafish serves as a paradigm to study the cell biology of  
179 blood vessel formation and includes processes such as apical polarization, junctional  
180 rearrangements and lumen formation, which occur within a 4 to 6 hours (Herwig et al.,  
181 2011). To assess the role of *Rasip1* during anastomosis, we compared the dynamics  
182 of junctional reporters such as VE-cad-Venus ([Figure 3a](#)) and Pecam-EGFP ([S-Figure](#)  
183 [3](#)) in wild-type and mutant embryos. Time-lapse analyses revealed two different  
184 defects in *rasip1* mutants during junctional ring formation. In about 53% of  
185 anastomosis events ([Figure 3a](#)) we observed ectopic accumulation of VE-cadherin-  
186 Venus or Pecam-EGFP ([S-Figure 3](#)) within the junctional ring, revealing a defect in  
187 relocating these junctional proteins from the apical compartment to cell junctions.  
188 Alternatively, in about 34% of cases, the anastomotic ring ([Figure 3c,e,f](#)) elongated  
189 along the blood vessel axis but failed to maintain a lateral axis, leading to a collapsed  
190 junctional ring.

191



192

193 The described defects were confirmed by immunofluorescent analysis of the junctional  
194 proteins VE-cad, ZO-1 (tight junction protein 1, Tjp1) and Esama (endothelial-selective  
195 adhesion molecule a) (Figure 3d-e). In *rasip1* mutants VE-cad, Zo-1 as well as Esama  
196 colocalized and formed reticulated junctions within the apical compartment. Together,  
197 these observations indicate that Rasip1 plays a crucial role in the dynamic re-  
198 localization of junctional components during *de novo* junction and lumen formation.

199

### 200 ***rasip1* mutants display transient intracellular luminal pockets**

201 As shown above *rasip1* mutant embryos display reduced vessel diameter and luminal  
202 defects (Figure 1e-g). These luminal defects affect the onset of blood flow in the ISVs  
203 (Figure 4a, yellow arrowhead). We observed that initially unlumenized ISVs remained  
204 unlumenized at least through day 4 of development (96 hpf) (Figure 4b). Moreover, in  
205 some instances we observed that initially lumenized blood carrying ISVs collapsed in  
206 subsequent stages (up to 96 hpf), indicating a role for Rasip1 in lumen maintenance  
207 (Figure 4b,c). Thus, although luminal defects can be attributed to the inability of  
208 endothelial cells to rearrange into a multicellular configuration (Figures 2 and 3), the  
209 above observations suggest an additional defect in the formation or maintenance of a  
210 continuous luminal compartment. This notion is supported by time-lapse analysis of  
211 ISV and DLAV formation during lumen formation (Figure 5a). The timing of lumen  
212 formation in the ISV is variable but usually starts between 30 and 32 hpf. In wild-type  
213 embryos we observed that upon initiation, continuous lumens were formed within 30  
214 minutes (Figure 5a). In *rasip1* mutants, lumen formation was delayed and  
215 discontinuous. Instead, we often observed luminal pockets in the dorsal aspects of the  
216 ISV (Figure 5a, yellow arrowheads, S-Figure 5d). We surmised that luminal pockets

217 could arise in three different ways (Figure 5b) – either (1) by a collapse of a previously  
218 patent tube, (2) by a local cord hollowing event, which failed to interconnect with other  
219 luminal pockets or (3) by the formation of large intracellular vacuolar structures, which  
220 failed to fuse with luminal membrane.

221 To differentiate between these scenarios, we performed a series of experiments. To  
222 test whether luminal pockets may arise by lumen collapse, we performed  
223 microangiography using a fluorescent tracer dye in 28 to 30 hpf embryos (Figure 5c).  
224 Upon intravascular injection, the entire patent vasculature was labelled by quantum  
225 dots. In *rasip1* mutants, however, we observed that although the base of the ISV was  
226 positive for quantum dots, local luminal pockets in the DLAV were negative (Figure 5c,  
227 yellow arrowheads). This strongly argues that luminal pockets in *rasip1* mutants arise  
228 locally and do not represent luminal remainders formed by lumen collapse.

229 We next wanted to check whether luminal pockets represented intra- or extracellular  
230 compartments. Extracellular luminal compartments arise between cells in a process  
231 called cord hollowing, whereas intracellular lumens are thought to form by vacuolation  
232 (Davis et al., 2011). During anastomosis in zebrafish embryos, cord hollowing  
233 generates luminal pockets form as transient structures at the interface between  
234 contacting tip cells (Blum et al., 2008). This interface is formed by a ring-shaped  
235 junction, which surrounds an apical compartment of both tip cells (Herwig et al., 2011).  
236 Thus, these extracellular pockets are demarcated by junctional rings, while  
237 intracellular pockets should be outside of these rings. To test these possibilities, we  
238 examined lumen formation in *rasip1* mutants expressing VE-cad-Venus and found that  
239 they were located outside the junctional ring (Figure 5d (00:12)), appearing as  
240 vesicular structures within the endothelial cytoplasm. Later on (Figure 5d (01:32)) these  
241 intracellular lumens were incorporated into the area covered by the junctional ring,

242 therefore representing transient structures. Taken together, these findings show that  
243 loss of Rasip1 function leads to a transient accumulation of intracellular vesicles, which  
244 later on merge into the anastomotic compartment suggesting that Rasip1 may be  
245 critical for normal vesicle transport or vesicle fusion during cord hollowing process,  
246 which occurs during anastomosis.

247

### 248 **Rasip1 localizes to apical membranes and endothelial cell junctions**

249 Our mutant analyses indicate a requirement for Rasip1 in junction formation and  
250 remodeling, as well as in lumen formation and maintenance. To gain a better  
251 understanding of how Rasip1 may be involved in these processes, we generated an  
252 antibody against zebrafish Rasip1 to discern the subcellular localization of the protein  
253 during angiogenesis. Immunofluorescent analysis confirmed endothelial expression of  
254 Rasip1 in zebrafish embryos ([S-Figure 4](#)). Notably, Rasip1 protein levels appeared  
255 dynamically regulated. During vasculogenesis, until the emergence of intersegmental  
256 sprouts, Rasip1 was detected at high levels in the dorsal aorta ([S-Figure 4a,b](#), yellow  
257 arrowheads). In contrast, Rasip1 protein was highly expressed in sprouting ISVs while  
258 it became downregulated in the dorsal aorta ([S-Figure 4c](#), yellow bars), supporting the  
259 notion that Rasip1 primarily functions during blood vessel morphogenesis rather than  
260 during vessel maintenance. High-resolution imaging revealed specific subcellular  
261 localization during blood vessel formation. In the context of anastomosis, three  
262 different phases could be discerned. First, during contact formation (30 hpf), we found  
263 that Rasip1 is absent from newly formed contacts ([Figure 6a](#), yellow arrowheads).  
264 However, Rasip1 was observed colocalizing with large junctional patches prior to  
265 discernable formation of apical compartments. During later stages of anastomosis,  
266 when the anastomotic ring had formed, Rasip1 was restricted to the apical

267 compartment within the junctional ring with no detectable Rasip1 at the junction  
268 (Figure 6b, yellow arrowheads). However, shortly later - during the establishment of  
269 the DLAV (36 hpf) and later after full development of angiogenic vessels (48 hpf) - ,  
270 we found that Rasip1 also localized to endothelial cell junctions (Figure 6c, white  
271 arrowheads). Taken together, these studies show that Rasip1 dynamically distributes  
272 during different phases of blood vessel formation. In particular, the dynamic subcellular  
273 distribution to apical membrane compartments and endothelial cell junctions suggests  
274 a sequential requirement for Rasip1 during apical compartment formation and  
275 junctional remodeling, respectively.

276

277 Because of the early localization of Rasip1 to the apical membrane, we wanted to test  
278 whether loss of Rasip1 function may affect apical polarization during blood vessel  
279 formation. To this end, we generated a transgenic reporter (*Tg(EGFP-podxl)<sup>ubs29</sup>*),  
280 which labels the apical membrane compartment (S-Figure 5a). At 48 hpf, we observed  
281 normal luminal localization of EGFP-Podxl in *rasip1* mutants (S-Figure 5b). In ISVs  
282 that displayed luminal defects, we observed slightly irregular distribution of EGFP-  
283 Podxl in affected areas (enlarged insets in S-Figure 5b). These observations suggest  
284 that in spite of its apical localization, Rasip1 is not required for apical polarization in  
285 endothelial cells.

286

### 287 **Overlapping requirement of Rasip1 and Radil-b in blood vessel formation**

288 Rasip1 protein has been shown to be an effector protein of the small GTPase Rap1  
289 (Gingras et al., 2016). Protein binding studies have shown that Rasip1 can form  
290 multimeric complexes consisting of Rap1, Rasip1, Radil (Ras-associating-dilute-  
291 domain) and the GTPase-activating protein Arhgap29 (Post et al., 2013). Furthermore,

292 it has been shown that the core of these complexes can be formed by a Rasip1  
293 homodimer or a Rasip1/Radil heterodimer (de Kreuk et al., 2016), indicating partly  
294 overlapping functions of these proteins in endothelial cells. Rasip1 and Radil are  
295 closely related proteins (S-Figure 6a) sharing several protein interaction domains such  
296 as a Ras association (RA) domain conferring binding to Rap1, and a forkhead  
297 association (FHA) domain binding the transmembrane receptor Heg1. An additional  
298 PDZ domain is unique to Radil and is thought to interact with the GTPase-activating  
299 protein Arhgap29 (Post et al., 2013). Radil function in endothelial cells has, so far, only  
300 been addressed in cell culture experiments, which established its above-mentioned  
301 protein interactions and indicated a role of Radil in endothelial barrier maintenance  
302 and the regulation of endothelial cell adhesion (de Kreuk et al., 2016; Pannekoek et  
303 al., 2014). Thus, we wanted to determine the role of Radil during blood vessel  
304 morphogenesis *in vivo* and compare its requirement to that of Rasip1. The zebrafish  
305 genome contains three *radil* paralogues, *radil-a*, *-b* and *-c*, respectively (S-Figure 6a).  
306 Whole-mount in situ analysis revealed that of the three paralogues, only *radil-b* was  
307 expressed specifically in endothelial cells (data not shown). Therefore, we analyzed  
308 blood vessel formation in *radilb*<sup>sa20161</sup> mutants, which carry a nonsense mutation  
309 (Tyr129 → STOP) near the N-terminus of the protein (S-Figure 6b).  
310 *radil-b* mutants were homozygous viable and could be raised to fertility. Nevertheless,  
311 they exhibited several vascular defects similar to *rasip1* mutants, including cerebral  
312 hemorrhages (S-Figure 6c), isolated luminal pockets (S-Figure 6d), reduction of blood  
313 flow (S-Figure 6e) and retarded sprouting of ISVs (data not shown), supporting the  
314 notion that both proteins are involved in the same molecular pathways. In contrast,  
315 *radil-b* mutants did not phenocopy the junctional re-localization defect observed in  
316 *rasip1* mutants during anastomosis (Figure 7a), suggesting that the proteins may also

317 have unique functions. *radil-b* mutants generally exhibited milder defects (S-Figure 6f,  
318 g), in particular with respect to cellular architecture compared to single *rasip1* mutants  
319 and *rasip1;radil-b* double mutants (Figure 7b). Furthermore, *rasip1;radil-b* double  
320 mutants showed stronger sprouting and lumen formation defects than either single  
321 mutant (Figure 7, S-Figure 6h), suggesting that while both proteins are required in this  
322 process, they likely act in a partially redundant manner.

323

### 324 **Knock-down of *ccm1* and *heg1* phenocopies aspects of the *rasip1* mutant**

325 The Rasip1/Radil/Rap1 complex can bind via the FHA domain to the orphan  
326 transmembrane receptor Heg1 (Gingras et al., 2016). This interaction has been shown  
327 to tether Rasip1 to endothelial cell junctions (Post et al., 2013). To address the  
328 relevance of this interaction during ISV morphogenesis, we analyzed *heg1* morphants  
329 in order to test whether loss of Heg1 function showed any *rasip1*-like vascular  
330 phenotypes. We also examined the phenotypes of *ccm1* morphants. Ccm1 binds to  
331 Heg1 independently of Rasip1 (Gingras et al., 2012), and thus might indirectly  
332 influence Rasip1 function. *ccm1* and *heg1* morphants exhibited blood vessel and heart  
333 dilations as previously published (S-Figure 7a) (Hogan et al., 2008; Kleaveland et al.,  
334 2009; Stainier et al., 1996). We consistently observed hemorrhages, which were less  
335 pronounced than in *rasip1* mutants (Figure 8a and S-Figure 7b). However, similar to  
336 *rasip1* mutants, ISV sprouting and development appeared to be delayed (Figure 8b).  
337 To assess the role of Heg1 and Ccm1 in junctional rearrangements, we analyzed  
338 endothelial cell junctions in transgenic VE-cad-Venus and Pecam1-EGFP reporter  
339 background (S-Figure 7e). Consistent with earlier reports (Hogan et al., 2008;  
340 Kleaveland et al., 2009), knock-down of *ccm1* or *heg1* did not cause obvious junctional  
341 defects in the dorsal aorta. However, we observed detachment of junctions and

342 impaired cell rearrangements in sprouting ISVs (S-Figure 7c, d). In addition, it  
343 appeared that Pecam-EGFP as well as VE-cad-Venus were not entirely cleared from  
344 apical compartments during the formation of the DLAV.

345 To verify these observations, we performed immunofluorescent analyses to determine  
346 whether endogenous VE-cadherin protein was cleared from the apical membrane  
347 compartment in *heg1* and *ccm1* morphants. In both conditions, VE-cadherin  
348 accumulated in the apical compartment embedded within the junctional rings – similar  
349 to what we observed of *rasip1* mutants (Figure 8c). *In vivo* imaging of the junctions in  
350 *ccm1* or *heg1* knock-down embryos showed a failure of multicellular vessel formation  
351 (Figure 8d). Taken together, these findings show that *ccm1* and *heg1* loss-of-function  
352 phenocopy defined aspects of *rasip1* mutants during critical aspects of blood vessel  
353 formation during sprouting angiogenesis and anastomosis.

354

## 355 Discussion

356 Small GTPases of the Rho family play a key role in the regulation of cellular activities  
357 during blood vessel formation. For example, they serve as molecular switches to  
358 control cytoskeletal dynamics, cell adhesion and junction assembly during angiogenic  
359 sprouting and lumen formation (Barlow and Cleaver, 2019). Rasip1 has been  
360 described as an effector protein of small GTPase signaling during blood vessel  
361 formation and maintenance (Koo et al., 2016; Wilson et al., 2013; Xu et al., 2011).  
362 Rasip1 protein contains multiple protein binding domains and has been shown to  
363 directly interact with its paralogue Radil, the small GTPase Rap1 and the  
364 transmembrane protein Heg1 (de Kreuk et al., 2016; Gingras et al., 2016; Wilson et  
365 al., 2013). By further association with proteins such as Arhgap29 and Ccm1, these  
366 proteins control cortical actomyosin tension and endothelial junction formation and

367 dynamics (Post et al., 2015) and reviewed by (Lampugnani et al., 2017; Wilson and  
368 Ye, 2014). Analyses of mutant mouse embryos have shown that *Rasip1* is required  
369 for proper lumen formation and maintenance in blood and lymphatic vessels (Koo et  
370 al., 2016; Liu et al., 2018; Wilson et al., 2013). During vasculogenesis, *Rasip1* is  
371 required for the establishment of the nascent apical compartment and subsequently  
372 for lumen expansion, presumably mediated by regulating *Cdc42* and *RhoA*,  
373 respectively (Barry et al., 2016).

374

### 375 **Multiple vascular defects in zebrafish *rasip1* mutants**

376 In order to gain a better understanding of how morphogenetic cell behaviors are  
377 controlled by *Rasip1*, we generated loss-of-function mutants in the zebrafish *rasip1*  
378 gene and analyzed these mutants focusing on cellular and junctional dynamics during  
379 angiogenic sprouting and anastomosis. Overall, our findings are in agreement with  
380 previously published vascular defects in mouse development, but also provide novel  
381 insights into the regulation of junctional dynamics during angiogenic sprouting and  
382 lumen formation.

383 *rasip1* mutants display numerous vascular defects, including cranial hemorrhage,  
384 reduced blood circulation and reduced diameter of the dorsal aorta, consistent with  
385 previously published *rasip1* knockdown experiments in zebrafish (Wilson et al., 2013).  
386 Furthermore, we observe delayed angiogenic sprouting, as well as abnormalities in  
387 lumen formation as well as impaired cell rearrangements, junctional dynamics and  
388 stability. Despite this wide range of defects, the mutant phenotypes are consistent with  
389 defects in the control of F-actin and junctional dynamics. The phenotypes of *rasip1*  
390 mutants during vascular development are, however, quite distinct from those seen in



391 *ve-cad* (*cdh5*) mutants (Sauteur et al., 2014) indicating that Rasip1 is regulating  
392 endothelial activities beyond cell junctions.

393

### 394 **Dynamic regulation of Rasip1 expression and subcellular localization**

395 Endothelial-specific expression of Rasip1 has been reported in several vertebrate  
396 species including mouse, *Xenopus* and zebrafish, and Rasip1 appears to be  
397 expressed in the entire embryonic vasculature (Wilson et al., 2013; Xu et al., 2009). In  
398 contrast to its broad endothelial transcription, the distribution of Rasip1 protein  
399 appears to highly regulated, with respect to the overall level and its subcellular  
400 localization. During vasculogenesis, Rasip1 is readily detected at high levels in the  
401 dorsal aorta, whereas at later stages expression is somewhat reduced. This  
402 downregulation of Rasip1 in the dorsal aorta coincides with the commencement of  
403 blood flow, suggesting that Rasip1 protein levels and localization may be controlled by  
404 shear stress. The downregulation of Rasip1 protein in more mature vessels suggests  
405 an essential role during blood vessel morphogenesis. In agreement with this, Rasip1  
406 does not appear to be required in established blood or lymphatic vessels (Koo et al.,  
407 2016; Liu et al., 2018).

408 During ISV sprouting we observe a shift of Rasip1 from the apical membrane  
409 compartment during the early stages to higher levels at cell junctions during the later  
410 stages of vascular tube formation. The early apical localization of Rasip1 is in  
411 agreement with a previously proposed role in early apical-basal polarization, likely  
412 upstream of Cdc42 (Barry et al., 2016). It will be important to determine how this  
413 differential localization is accomplished or to what extent it reflects different functions  
414 of Rasip1 during tubulogenesis. In *Drosophila*, it has been shown that apical  
415 localization of canoe (the ortholog of vertebrate *afadin* and a homologue of *rasip1*) is

416 dependent on Rap1 (Bonello et al., 2018). Therefore, Rap1 is a putative candidate to  
417 localize Rasip1 to apical membrane during vertebrate angiogenesis.

418

### 419 **A role for Rasip1 in angiogenic sprouting and blood vessel assembly**

420 Sprouting angiogenesis is accomplished by concerted endothelial cell dynamics  
421 including cell migration, rearrangement, elongation and proliferation, all of which are  
422 affected by the loss Rasip1 function. *rasip1* mutant ISVs contain fewer cells than wild-  
423 type ISV, which reflects a reduced rate of cell proliferation during sprouting.

424 Furthermore, we observe a frequent failure of *rasip1* mutant ISVs to form multicellular  
425 tubes. Formation of multicellular ISVs does not depend of the number of cells present  
426 in the sprout (Angulo-Urarte et al., 2018) but rather relies on cell rearrangements  
427 driven by junctional remodeling (Sauteur et al., 2014). For example, loss of VE-cad  
428 prevents junction elongation and renders endothelial cells unable to move over each  
429 other and effectively pair to form a multicellular tube (Paatero et al., 2018; Sauteur et  
430 al., 2014). In *rasip1* mutants, however, the defect in cell pairing is caused by junctional  
431 detachments. When we imaged VE-cad dynamics during ISV sprouting in wild-type  
432 embryos, we found that, in many cases, two stalk cells maintain contact to the dorsal  
433 aorta. In *rasip1* mutant sprouts, we observed that one of these cells detached from the  
434 dorsal aorta and “retracted” to the dorsal part of the ISV, leaving the remaining cell  
435 unpaired. Stalk cell detachment appears to occur at tri-cellular junctions indicating that  
436 these junctions may be important as an anchor point to resist mechanical forces  
437 occurring during cell rearrangements. A study performed in MDCK cells has shown that  
438 Afadin accumulates at tri-cellular junctions in response to tension (Choi et al., 2016).  
439 This finding supports the interesting notion that Rasip1 may play a specific role in  
440 reinforcing tri-cellular junctions during sprouting angiogenesis.

441

## 442 **Rasip1 is required for lumen patency**

443 Lumen formation in *rasip1* mutants is delayed and ISVs as well as the dorsal aorta  
444 show reduced vessel diameters during early embryonic development. At 48 hpf, we  
445 observed that about 50% of the ISVs were not patent and this defect was maintained  
446 at least through day 4 of development. Defects in luminal patency may have multiple  
447 causes. First, as described above, junctional detachment can prevent endothelial cell  
448 pairing and thus multicellular tube formation. Second, our examinations of the apical  
449 membrane using a Podxl-EGFP and Cherry-CAAX transgenic markers revealed an  
450 irregular shape of the apical membrane, suggesting luminal collapse. This observation  
451 agrees with earlier findings that Rasip1 regulates cortical actin tension during lumen  
452 opening of the dorsal aorta in mouse (Barry et al., 2016).

453 During the formation of the DLAV formation, we also observed luminal pockets, which  
454 did not label by microangiography and appeared outside of cell junctions, indicating  
455 that these lumens are intracellular and consist of large vesicles or vacuolar structures.  
456 Rasip1 has been shown to associate with early Rab5-positive and recycling Rab8-  
457 positive endosomes (Barry et al., 2016) and Rab8 has been implicated in the transport  
458 of Podocalyxin to the apical membrane in a Cdc42 dependent manner (Bryant et al.,  
459 2010). Further analyses will have to be undertaken to determine whether these  
460 intracellular lumens are endosomal compartments and whether Rasip1 plays a role in  
461 targeting recycling endosomes to the apical compartment.

462

## 463 **Rasip1 during anastomosis**

464 Vascular anastomosis is the process by which blood vessel connect and form a  
465 network. Formation of the DLAV in the zebrafish is initiated by the interaction of two

466 neighboring tip cells which establish contact and form a localized *de novo* lumen at  
467 their interface (Herwig et al., 2011) reviewed by (Betz et al., 2016). Formation of this  
468 luminal pocket follows a relatively stereotyped sequence: upon initial interfilopodial  
469 contact a junctional spot is formed, which is transformed into a ring surrounding apical  
470 membrane. This spot to ring transformation entails the formation and expansion of a  
471 stable junctional ring and the removal of junctional proteins from the center to permit  
472 formation of an apical membrane compartment. Loss of Rasip1 prevents apical  
473 clearance leading to ectopic junctions within newly formed apical compartments. A  
474 similar phenotype has been observed in *Rasip1* mouse mutants during lumen  
475 formation of the dorsal aorta and it was shown that this requirement is upstream of  
476 Cdc42 (Barry et al., 2016). Thus, the molecular mechanisms driving apical clearance  
477 during vasculogenesis and anastomosis appear to be rather conserved.

478 *In vitro* experiments have shown that Rasip1 localization at cell junctions requires its  
479 interaction with the orphan receptor Heg1 (de Kreuk et al., 2016) and it has been  
480 suggested that Rasip1 acts in concert with Heg1, Rap1 and Ccm1 and other proteins  
481 in junction stabilization (reviewed by (Lampugnani et al., 2017)). To test whether  
482 Rasip1, Ccm1 and Heg1 may interact during apical clearance, we performed  
483 knockdown experiments. Knockdown of *ccm1* as well as *heg1* in zebrafish phenocopy  
484 the apical clearance defects seen in *rasip1* mutants. Taken together, these data  
485 suggest that some of the pathways which are involved in junction stabilization are also  
486 required for or result in apical clearance during *de novo* lumen formation.

487 Rasip1, Radil and Arghap29 have been shown to form a complex and are thought to  
488 regulate RhoA. Our analysis of *radil-b* and *rasip1/radil-b* double mutants has shown  
489 that both proteins have similar functions during angiogenic sprouting and lumen  
490 formation and maintenance. However, Radil-b appears to be dispensable for apical

491 junctional re-localization during anastomosis. In agreement with this interpretation,  
492 studies in the mouse dorsal aorta have shown that clearance of apical junction  
493 requires Cdc42 and is independent of RhoA (Barry et al., 2016).

494 In mouse dorsal aortae, loss of Rasip1 leads to an overactivation of Rock and an  
495 increase of cortical actomyosin tension in the apical compartment (Barry et al., 2016).

496 As a consequence, the luminal surface of the endothelium cannot expand and the  
497 lumen is constricted. In relation to this, we observe a collapse of the junctional ring  
498 during anastomosis while the junctions are still maintained and elongate along the  
499 vascular axis, resulting in a narrower apical compartment within the ring, eventually  
500 leading to a close alignment of the junctions along the extending axis. We speculate  
501 that this collapse of the junctional ring may be caused by an imbalance of the cortical  
502 actin between apical and basolateral compartment, caused by an overactivation of  
503 Rock at the apical side. Further studies on local actomyosin regulation will be required  
504 to better understand the formation of a luminal surface during vasculogenesis and  
505 vascular anastomosis.

506

## 507 Materials and Methods

### 508 Zebrafish Strains and Morpholinos

509 Zebrafish were maintained according to FELASA guidelines (Aleström et al., 2019).  
510 All experiments were performed in accordance with federal guidelines and were  
511 approved by the Kantonales Veterinäramt of Kanton Basel-Stadt. Zebrafish lines used  
512 were *Tg(gata1a:DsRed)<sup>sd2</sup>* (Traver et al., 2003), *Tg(kdrl:EGFP)<sup>s843</sup>* (Jin, 2005),  
513 *Tg(kdrl:EGFPnls)<sup>ubs1</sup>* (Blum et al., 2008), *Tg(5xUAS:RFP)* (Asakawa and Kawakami,  
514 2008), *Tg(fli1ep:gal4ff)<sup>ubs3</sup>* (Herwig et al., 2011), *Tg(fli1a:Pecam-EGFP)<sup>ncv27</sup>* (Ando et  
515 al., 2016), *Tg(cdh5:cdh5-TFP-TENS-Venus)<sup>uq11bh</sup>* (Lagendijk et al., 2017),  
516 *Tg(UAS:EGFPpodxl)<sup>ubs29</sup>* (this study) and *rasip1<sup>ubs28</sup>* (this study) and *radilb<sup>sa20161</sup>*  
517 (European Zebrafish Resource Center, Karlsruhe, Germany). Morpholinos (Gene-  
518 Tools, Corvallis, OR, USA) used were as follows:

519 *ccm1* 5'-GCTTTATTTACCTCACCTCATAGG-3' (Mably, 2006),  
520 *heg1* 5'-GTAATCGTACTTGCAGCAGGTGACA-3' (Mably et al., 2003),  
521 standard control 5'-CCTCTTACCTCAGTTACAATTTATA-3'.

522

### 523 Generation of *Tg(UAS:EGFPpodxl)<sup>ubs29</sup>*

524 The p5E-4xnrUAS promoter, pME-EGFP-podocalyxin (Navis et al., 2013) and p3E-  
525 polyA (Kwan et al., 2007) were cloned into a Tol2 vector pDestTol2CG2 carrying  
526 cmcl2:GFP to drive expression of GFP in the heart. The final plasmid was co-injected  
527 with tol2 mRNA into the *Tg(fli1ep:gal4ff)<sup>ubs3</sup>; (UAS:mRFP)* embryos. These mosaic  
528 embryos were raised to adulthood and outcrossed with the parental fish line to  
529 generate stable fish lines. The resulting *Tg(UAS:EGFPpodxl)* embryos were identified  
530 on the basis of GFP expression in the heart; proper apical localization of EGFP-  
531 Podocalyxin was confirmed using confocal microscopy. Two transgenic lines, *ubs29*

532 and ubs30, were isolated, and the ubs29 line showing more homogenous expression  
533 levels in endothelium was used in experiments.

534

### 535 **Immunofluorescence**

536 Immunofluorescence was performed as previously described (Herwig et al., 2011).  
537 The following antibodies were used: rabbit anti-zf-Cdh5 1:200 (Blum et al., 2008),  
538 rabbit anti-Esama 1:200 (Sauteur et al., 2017), mouse anti-human-Zo-1 1:100  
539 (Thermofisher), rabbit anti-Rasip1 1:500 (this paper), chicken anti-GFP 1:200  
540 (Abcam), Alexa 405 goat anti-chicken immunoglobulin Y (IgY H&L) 1:1,000 (Abcam),  
541 Alexa 568 goat anti-rabbit immunoglobulin G (IgG) 1:1,000, and Alexa 633 goat anti-  
542 mouse IgG 1:1,000 (both from Thermofisher). The anti-zf-Rasip1 antibodies were  
543 raised in rabbits against a synthetic peptide (CRTFLWGLDQDEL PANQRTRL-COOH)  
544 comprising the terminal amino acid residues (aa970-989) of the protein (Yenzym,  
545 Antibodies LLC, Brisbane (CA, USA)).

546

### 547 **Live Imaging**

548 Time-lapse imaging was performed as previously described (Paatero et al., 2018). All  
549 movies were taken with Leica SP5 or SP8 confocal microscopes using a 40x water  
550 immersion objective (NA = 1.1) with a frame size of 1024x512 or 1024x1024 pixels.  
551 Routinely, z stacks consisted of 80–100 slices with a step size of 0.8–1  $\mu\text{m}$ . Stacks  
552 were taken every 8- or 10-min. High-resolution imaging was performed a Zeiss  
553 LSM880 microscope using a 40x water immersion objective (NA = 1.2) using a vertical  
554 step size of 0.25  $\mu\text{m}$ .

555

### 556 **Statistics**

557 Unless explicitly stated, all results shown were obtained from at least 3 independent  
558 experiments, sample sizes were not predetermined, the experiments were not  
559 randomized and investigators were not blinded to allocation during experiments and  
560 outcome assessment. Statistical analyses were performed using Prism software  
561 (GraphPad) and ordinary unpaired two-tailed Mann-Whitney test.

562



## 563 Author Contributions

564

565 H.-G.B. and M.A. conceived the project; M.L. performed most experiments and  
566 prepared the figures. C.B. generated *rasip1* mutant alleles and performed initial  
567 experiments. N.S. characterized *radil-b* mutants; I.P. generated the  
568 *Tg(UAS:EGFPpodxl)<sup>ubs29</sup>* zebrafish line; J.Y. analyzed *heg1* and *ccm1* morphants;  
569 C.W.W. and W.Y. provided the anti-zf-Rasip1 antibody; M.A and H.-G.B. supervised  
570 the project. M.L., M.A. and H.-G.B. wrote the manuscript. All authors read and  
571 approved the manuscript.

572

## 573 Acknowledgements

574

575 We would like to thank the Biozentrum Imaging Core Facility for ceaseless support,  
576 Dr. Li-Kun Phng and Gustavo Aguilar for critically reading the manuscript, Dr. Anne  
577 Karine Lagendijk and Dr. Benjamin M. Hogan for providing the transgenic VE-cad-  
578 Venus reporter , Dr. David Dylus for help on phylotypic analysis and Kumuthini  
579 Kulendra and Mattias Thimm for fish husbandry. M.L. was supported by a fellowship  
580 from the Werner-Siemens-Foundation (Zug). This work has been supported by the  
581 Kantons Basel-Stadt and Basel-Land and by a grant from the Swiss National Science  
582 Foundation to M.A.

583

## 584 References

- 585 Adams, R.H., Alitalo, K., 2007. Molecular regulation of angiogenesis and  
586 lymphangiogenesis. *Nature Reviews Molecular Cell Biology* 8, 464–478.  
587 doi:10.1038/nrm2183
- 588 Aleström, P., D'Angelo, L., Midtlyng, P.J., Schorderet, D.F., Schulte-Merker, S.,  
589 Sohm, F., Warner, S., 2019. Zebrafish: Housing and husbandry  
590 recommendations. *Lab Anim* 51, 002367721986903–12.  
591 doi:10.1177/0023677219869037
- 592 Ando, K., Fukuhara, S., Izumi, N., Nakajima, H., Fukui, H., Kelsh, R.N., Mochizuki,  
593 N., 2016. Clarification of mural cell coverage of vascular endothelial cells by live  
594 imaging of zebrafish. *Development* 143, 1328–1339. doi:10.1242/dev.132654
- 595 Angulo-Urarte, A., Casado, P., Castillo, S.D., Kobialka, P., Kotini, M.P., Figueiredo,  
596 A.M., Castel, P., Rajeeve, V., Guasch, M.M.X., Millán, J., Wiesner, C., Serra, H.,  
597 Muixi, L., Casanovas, O., als, F.V.X., Affolter, M., Gerhardt, H., Huveneers, S.,  
598 Belting, H.-G., Cutillas, P.R., Graupera, M., 2018. Endothelial cell  
599 rearrangements during vascular patterning require PI3-kinase-mediated inhibition  
600 of actomyosin contractility. *Nature Communications* 1–16. doi:10.1038/s41467-  
601 018-07172-3
- 602 Asakawa, K., Kawakami, K., 2008. Targeted gene expression by the Gal4-UAS  
603 system in zebrafish. *Develop. Growth Differ.* 50, 391–399. doi:10.1111/j.1440-  
604 169X.2008.01044.x
- 605 Baeyens, N., Bandyopadhyay, C., Coon, B.G., Yun, S., Schwartz, M.A., 2016.  
606 Endothelial fluid shear stress sensing in vascular health and disease. *J. Clin.*  
607 *Invest.* 126, 821–828. doi:10.1172/JCI83083
- 608 Barlow, H.R., Cleaver, O., 2019. Building Blood Vessels—One Rho GTPase at a  
609 Time. *Cells* 8, 545–25. doi:10.3390/cells8060545
- 610 Barry, D.M., Koo, Y., Norden, P.R., Wylie, L.A., Xu, K., Wichaidit, C., Azizoglu, D.B.,  
611 Zheng, Y., Cobb, M.H., Davis, G.E., Cleaver, O., 2016. Rasip1-Mediated Rho  
612 GTPase Signaling Regulates Blood Vessel Tubulogenesis via Nonmuscle  
613 Myosin II. *Circ Res* 119, 810–826. doi:10.1161/CIRCRESAHA.116.309094
- 614 Betz, C., Lenard, A., Belting, H.-G., Affolter, M., 2016. Cell behaviors and dynamics  
615 during angiogenesis. *Development* 143, 2249–2260. doi:10.1242/dev.135616
- 616 Blum, Y., Belting, H.-G., Ellertsdottir, E., Herwig, L., Lüders, F., Affolter, M., 2008.  
617 Complex cell rearrangements during intersegmental vessel sprouting and vessel  
618 fusion in the zebrafish embryo. *Developmental Biology* 316, 312–322.  
619 doi:10.1016/j.ydbio.2008.01.038
- 620 Bonello, T.T., Perez-Vale, K.Z., Sumigray, K.D., Peifer, M., 2018. Rap1 acts via  
621 multiple mechanisms to position Canoe and adherens junctions and mediate  
622 apical-basal polarity establishment. *Development* 145, dev157941–21.  
623 doi:10.1242/dev.157941
- 624 Bryant, D.M., Datta, A., Rodriguez-Fraticelli, A.E., Peränen, J., Martin-Belmonte, F.,  
625 Mostov, K.E., 2010. A molecular network for de novo generation of the apical  
626 surface and lumen. *Nat Cell Biol* 12, 1035–1045. doi:10.1038/ncb2106
- 627 Choi, W., Acharya, B.R., Peyret, G., Fardin, M.-A., Mège, R.-M., Ladoux, B., Yap,  
628 A.S., Fanning, A.S., Peifer, M., 2016. Remodeling the zonula adherens in  
629 response to tension and the role of afadin in this response. *The Journal of Cell*  
630 *Biology* 213, 243–260. doi:10.1083/jcb.201506115
- 631 Davis, G.E., Stratman, A.N., Sacharidou, A., Koh, W., 2011. Molecular Basis for  
632 Endothelial Lumen Formation and Tubulogenesis During Vasculogenesis and

- 633 Angiogenic Sprouting, 1st ed, International Review Of Cell and Molecular  
634 Biology. Elsevier Inc. doi:10.1016/B978-0-12-386041-5.00003-0
- 635 de Kreuk, B.-J., Gingras, A.R., Knight, J.D., Liu, J.J., Gingras, A.-C., Ginsberg, M.H.,  
636 2016. Heart of glass anchors Rasip1 at endothelial cell-cell junctions to support  
637 vascular integrity. *eLife* 5, e11394. doi:10.7554/eLife.11394
- 638 Duran, C.L., Howell, D.W., Dave, J.M., Smith, R.L., Torrie, M.E., Essner, J.J.,  
639 Bayless, K.J., 2017. Molecular Regulation of Sprouting Angiogenesis. *Compr*  
640 *Physiol* 8, 153–235. doi:10.1002/cphy.c160048
- 641 Gebala, V., Collins, R., Geudens, I., Phng, L.-K., Gerhardt, H., 2016. Blood flow  
642 drives lumen formation by inverse membrane blebbing during angiogenesis  
643 in vivo. *Nat Cell Biol* 18, 443–450. doi:10.1038/ncb3320
- 644 Gingras, A.R., Liu, J.J., Ginsberg, M.H., 2012. Structural basis of the junctional  
645 anchorage of the cerebral cavernous malformations complex. *The Journal of Cell*  
646 *Biology* 199, 39–48. doi:10.1083/jcb.201205109
- 647 Gingras, A.R., Puzon-McLaughlin, W., Bobkov, A.A., Ginsberg, M.H., 2016.  
648 Structural Basis of Dimeric Rasip1 RA Domain Recognition of the Ras Subfamily  
649 of GTP-Binding Proteins. *Structure/Folding and Design* 24, 2152–2162.  
650 doi:10.1016/j.str.2016.10.001
- 651 Herwig, L., Blum, Y., Krudewig, A., Ellertsdottir, E., Lenard, A., Belting, H.-G.,  
652 Affolter, M., 2011. Distinct Cellular Mechanisms of Blood Vessel Fusion in the  
653 Zebrafish Embryo. *Current Biology* 21, 1942–1948.  
654 doi:10.1016/j.cub.2011.10.016
- 655 Hogan, B.M., Bussmann, J., Wolburg, H., Schulte-Merker, S., 2008. ccm1 cell  
656 autonomously regulates endothelial cellular morphogenesis and vascular  
657 tubulogenesis in zebrafish. *Human Molecular Genetics* 17, 2424–2432.  
658 doi:10.1093/hmg/ddn142
- 659 Jin, S.W., 2005. Cellular and molecular analyses of vascular tube and lumen  
660 formation in zebrafish. *Development* 132, 5199–5209. doi:10.1242/dev.02087
- 661 Kleaveland, B., Zheng, X., Liu, J.J., Blum, Y., Tung, J.J., Zou, Z., Sweeney, S.M.,  
662 Chen, M., Guo, L., Lu, M.-M., Zhou, D., Kitajewski, J., Affolter, M., Ginsberg,  
663 M.H., Kahn, M.L., 2009. Regulation of cardiovascular development and integrity  
664 by the heart of glass–cerebral cavernous malformation protein pathway. *Nature*  
665 *Medicine* 15, 169–176. doi:10.1038/nm.1918
- 666 Koo, Y., Barry, D.M., Xu, K., Tanigaki, K., Davis, G.E., Mineo, C., Cleaver, O., 2016.  
667 Rasip1 is essential to blood vessel stability and angiogenic blood vessel growth.  
668 *Angiogenesis* 1–18. doi:10.1007/s10456-016-9498-5
- 669 Kwan, K.M., Fujimoto, E., Grabher, C., Mangum, B.D., Hardy, M.E., Campbell, D.S.,  
670 Parant, J.M., Yost, H.J., Kanki, J.P., Chien, C.-B., 2007. The Tol2kit: A multisite  
671 gateway-based construction kit for Tol2 transposon transgenesis constructs. *Dev.*  
672 *Dyn.* 236, 3088–3099. doi:10.1002/dvdy.21343
- 673 Legendijk, A.K., Gomez, G.A., Baek, S., Hesselson, D., Hughes, W.E., Paterson, S.,  
674 Conway, D.E., Belting, H.-G., Affolter, M., Smith, K.A., Schwartz, M.A., Yap,  
675 A.S., Hogan, B.M., 2017. Live imaging molecular changes in junctional tension  
676 upon VE-cadherin in zebrafish. *Nature Communications* 1–12.  
677 doi:10.1038/s41467-017-01325-6
- 678 Lampugnani, M.G., Dejana, E., Giampietro, C., 2017. Vascular Endothelial (VE)-  
679 Cadherin, Endothelial Adherens Junctions, and Vascular Disease (2017). *Cold*  
680 *Spring Harbor Perspectives in Biology* 9. doi:10.1101/cshperspect.a033720

- 681 Lawson, N.D., Weinstein, B.M., 2002. In Vivo Imaging of Embryonic Vascular  
682 Development Using Transgenic Zebrafish. *Developmental Biology* 248, 307–318.  
683 doi:10.1006/dbio.2002.0711
- 684 Lenard, A., Ellertsdottir, E., Herwig, L., Krudewig, A., Sauter, L., Belting, H.-G.,  
685 Affolter, M., 2013. In vivo analysis reveals a highly stereotypic morphogenetic  
686 pathway of vascular anastomosis. *Developmental Cell* 25, 492–506.  
687 doi:10.1016/j.devcel.2013.05.010
- 688 Liu, X., Gu, X., Ma, W., Oxendine, M., Gil, H.J., Davis, G.E., Cleaver, O., Oliver, G.,  
689 2018. Rasip1 controls lymphatic vessel lumen maintenance by regulating  
690 endothelial cell junctions. *Development* 145. doi:10.1242/dev.165092
- 691 Mably, J.D., 2006. santa and valentine pattern concentric growth of cardiac  
692 myocardium in the zebrafish. *Development* 133, 3139–3146.  
693 doi:10.1242/dev.02469
- 694 Mably, J.D., Burns, C.G., Chen, J.-N., Fishman, M.C., Mohideen, M.-A.P.K., 2003.  
695 heart of glass Regulates the Concentric Growth of the Heart in Zebrafish. *Current*  
696 *Biology* 13, 2138–2147. doi:10.1016/j.cub.2003.11.055
- 697 Navis, A., Marjoram, L., Bagnat, M., 2013. Cfr controls lumen expansion and  
698 function of Kupffer's vesicle in zebrafish. *Development* 140, 1703–1712.  
699 doi:10.1242/dev.091819
- 700 Paatero, I., Sauter, L., Lee, M., Lagendijk, A.K., Heutschi, D., Wiesner, C.,  
701 Guzmán, C., Bieli, D., Hogan, B.M., Affolter, M., Belting, H.-G., 2018. Junction-  
702 based lamellipodia drive endothelial cell rearrangements in vivo via a VE-  
703 cadherin-F-actin based oscillatory cell-cell interaction. *Nature Communications*  
704 1–13. doi:10.1038/s41467-018-05851-9
- 705 Pannekoek, W.-J., Post, A., Bos, J.L., 2014. Rap1 signaling in endothelial barrier  
706 control. *Cell Adhesion & Migration* 8, 100–107. doi:10.4161/cam.27352
- 707 Phng, L.-K., Gebala, V., Bentley, K., Philippides, A., Wacker, A., Mathivet, T.,  
708 Sauter, L., Stanchi, F., Belting, H.-G., Affolter, M., Gerhardt, H., 2015. Formin-  
709 Mediated Actin Polymerization at Endothelial Junctions Is Required for Vessel  
710 Lumen Formation and Stabilization. *DEVCEL* 32, 123–132.  
711 doi:10.1016/j.devcel.2014.11.017
- 712 Post, A., Pannekoek, W.-J., Ross, S.H., Verlaan, I., Brouwer, P.M., Bos, J.L., 2013.  
713 Rasip1 mediates Rap1 regulation of Rho in endothelial barrier function through  
714 ArhGAP29. *Proc. Natl. Acad. Sci. U.S.A.* 110, 11427–11432.  
715 doi:10.1073/pnas.1306595110
- 716 Post, A., Pannekoek, W.J., Ponsioen, B., Vliem, M.J., Bos, J.L., 2015. Rap1 Spatially  
717 Controls ArhGAP29 To Inhibit Rho Signaling during Endothelial Barrier  
718 Regulation. *Molecular and Cellular Biology* 35, 2495–2502.  
719 doi:10.1128/MCB.01453-14
- 720 Sauter, L., Affolter, M., Belting, H.-G., 2017. Distinct and redundant functions of  
721 Esama and VE-cadherin during vascular morphogenesis. *Development* 144,  
722 1554–1565. doi:10.1242/dev.140038
- 723 Sauter, L., Krudewig, A., Herwig, L., Ehrenfeuchter, N., Lenard, A., Affolter, M.,  
724 Belting, H.-G., 2014. Cdh5/VE-cadherin Promotes Endothelial Cell Interface  
725 Elongation via Cortical Actin Polymerization during Angiogenic Sprouting.  
726 *CellReports* 9, 504–513. doi:10.1016/j.celrep.2014.09.024
- 727 Stainier, D.Y., Fouquet, B., Chen, J.N., Warren, K.S., Weinstein, B.M., Meiler, S.E.,  
728 Mohideen, M.A., Neuhaus, S.C., Solnica-Krezel, L., Schier, A.F., Zwartkuis, F.,  
729 Stemple, D.L., Malicki, J., Driever, W., Fishman, M.C., 1996. Mutations affecting

- 730 the formation and function of the cardiovascular system in the zebrafish embryo.  
731 *Development* 123, 285–292.
- 732 StriliC, B., KuCera, T., Eglinger, J., Hughes, M.R., McNagny, K.M., Tsukita, S.,  
733 Dejana, E., Ferrara, N., Lammert, E., 2009. The Molecular Basis of Vascular  
734 Lumen Formation in the Developing Mouse Aorta. *DEVCEL* 17, 505–515.  
735 doi:10.1016/j.devcel.2009.08.011
- 736 Traver, D., Paw, B.H., Poss, K.D., Penberthy, W.T., Lin, S., Zon, L.I., 2003.  
737 Transplantation and in vivo imaging of multilineage engraftment in zebrafish  
738 bloodless mutants. *Nat Immunol* 4, 1238–1246. doi:10.1038/ni1007
- 739 Wilson, C.W., Parker, L.H., Hall, C.J., Smyczek, T., Mak, J., Crow, A., Posthuma, G.,  
740 De Mazière, A., Sagolla, M., Chalouni, C., Vitorino, P., Roose-Girma, M.,  
741 Warming, S., Klumperman, J., Crosier, P.S., Ye, W., 2013. Rasip1 regulates  
742 vertebrate vascular endothelial junction stability through Epac1-Rap1 signaling.  
743 *Blood* 122, 3678–3690. doi:10.1182/blood-2013-02-483156
- 744 Wilson, C.W., Ye, W., 2014. Regulation of vascular endothelial junction stability and  
745 remodeling through Rap1-Rasip1 signaling. *Cell Adhesion & Migration* 8, 76–83.  
746 doi:10.4161/cam.28115
- 747 Xu, K., Chong, D.C., Rankin, S.A., Zorn, A.M., Cleaver, O., 2009. Rasip1 is required  
748 for endothelial cell motility, angiogenesis and vessel formation. *Developmental*  
749 *Biology* 329, 269–279. doi:10.1016/j.ydbio.2009.02.033
- 750 Xu, K., Sacharidou, A., Fu, S., Chong, D.C., Skaug, B., Chen, Z.J., Davis, G.E.,  
751 Cleaver, O., 2011. Blood vessel tubulogenesis requires Rasip1 regulation of  
752 GTPase signaling. *Developmental Cell* 20, 526–539.  
753 doi:10.1016/j.devcel.2011.02.010  
754

## 755 Figure legends

756 **Figure 1: Vascular defects in zebrafish *rasip1* mutants. (a)** Conserved Rasip1  
757 protein domains. RA: Ras association domain. FHA forkhead-association domain.  
758 DIL: dilute domain. The *rasip1<sup>ubs28</sup>* mutant allele consists of a 35kb deletion comprising  
759 all three domains. **(b)** quantification of cranial hemorrhages in *rasip1<sup>ubs28</sup>* mutant  
760 embryos.  $p < 0.0001$  (Fisher's exact test). **(c)** confocal images of cranial hemorrhages  
761 in *rasip1<sup>ubs28</sup>* embryos (72 hpf). Blood cells are visualized by *gata1:dsRed* expression.  
762 Scale bar, 50  $\mu\text{m}$ . **(d)** bright field image (BF) of wild-type and *rasip1<sup>ubs28</sup>* embryos  
763 showing pericardial edema. Scale bar, 2 mm. **(e)** confocal images of wild-type and  
764 *rasip1<sup>ubs28</sup>* mutants. Mutants show narrower DA and irregular ISV diameters. Scale  
765 bar, 50  $\mu\text{m}$ . **(f)** quantification of DA diameters ( $\mu\text{m}$ ) during embryonic development (32  
766 to 120 hpf). Mann-Whitney test and error bars indicate standard deviation; significance  
767 (ns=not significant, \* $p < 0.1$ ). (WT 32, 48, 72, 120 hpf:  $n=4, 4, 9, 13$  embryos;  
768 *rasip1<sup>ubs28/+</sup>*  $n=5, 12, 19, 33$ ; *rasip1<sup>ubs28</sup>*  $n=6, 10, 9, 10$ ). **(g)** quantification of ISV  
769 diameters ( $\mu\text{m}$ ) during embryonic development (32 to 120 hpf). Embryos were  
770 analyzed by unpaired two-tailed Mann-Whitney test and error bars indicate standard  
771 deviation; significance (ns=not significant, \* $p < 0.1$ , \*\* $p < 0.01$ , \*\*\*\* $p < 0.0001$ ). (WT  
772 48, 72, 120 hpf:  $n=37, 94, 70$  ISVs; *rasip1<sup>ubs28/+</sup>*  $n=104, 52, 198$ ; *rasip1<sup>ubs28</sup>*  $n=67, 38,$   
773 65).

774

775 **Figure 2: Formation of multicellular vessels is impaired in *rasip1* mutants. (a)**  
776 Still pictures of time-lapse movies (s-movies 7 and 8) showing endothelial cell  
777 junctions (Cdh5-Venus) in wild-type and *rasip1<sup>ubs28</sup>* embryos. White arrowheads show  
778 maintained junctional in wild-type ISV sprouts. Yellow arrowheads indicate junctional  
779 detachment in mutant embryos. Scale bars, 20  $\mu\text{m}$ . Bottom row: closeups of showing

780 junctional detachment in  $a^4$  and  $a^5$ . **(b-e)** Quantification of junctional and cellular  
781 configuration during ISV formation in wild-type and *rasip1<sup>ubs28</sup>* mutant embryos. **(b)**  
782 Percentage multicellular tubes at 48 hpf (wt  $n=8$ , mut  $n=6$ ). **(c)** Speed of multicellular  
783 tube formation (wt  $n=5$ , mut  $n=6$ ). **(d)** Percentage of ISV with multicellular configuration  
784 per embryo (WT  $n=4$ , mut  $n=5$ ). **(e)** Percentage of single cell ISVs at 32 hpf (WT  $n=8$ ,  
785 mut  $n=8$ ). Quantifications were done by counting ISVs showing the respective  
786 phenotypes, averaged by total ISVs analysed per embryo. **(f)** Immunofluorescence of  
787 Zo-1 and Esama in *Tg(kdrl:EGFP)<sup>s843</sup>* at 32 hpf. Schematic drawings on the right show  
788 the different cellular configurations of multicellular (wt) and unicellular (*rasip1* mutant)  
789 ISVs. Scale bars, 5  $\mu\text{m}$ . The data was analyzed by unpaired two-tailed Mann-Whitney  
790 test and error bars indicate standard deviation; significance (\* $p < 0.1$ , \*\* $p < 0.01$ ).

791

792 **Figure 3: Requirement of Rasip 1 for dynamic re-localization of junctional**  
793 **proteins and junctional ring formation during anastomosis.** **(a-c)** Still pictures of  
794 time-lapse movies (s-movies 9-11) showing normal junctional patch to ring  
795 transformation in wild-type (a) and aberrant ring formation in *rasip1<sup>ubs28</sup>* mutants (b,  
796 c). Transgenic embryos expressing a VE-cadherin-Venus fusion protein were imaged,  
797 starting at 30 hpf. Scale bar, 5  $\mu\text{m}$ . **(d)** Immunofluorescence analysis of Zo-1 and VE-  
798 cadherin in *Tg(kdrl:EGFP)<sup>s843</sup>* at 32 hpf. *rasip1<sup>ubs28</sup>* mutants show reticulated junctions  
799 between two cells in the DLAV; wild-type embryo forms a cleared, ring-shaped  
800 junction. Scale bars, 20  $\mu\text{m}$  (overview) and 5  $\mu\text{m}$  (inset). **(e)** Immunofluorescence  
801 analysis of Zo-1 and ESAMa in *Tg(kdrl:EGFP)<sup>s843</sup>* at 32 hpf showing a collapsed  
802 junctional ring in *rasip1<sup>ubs28</sup>* mutants. Scale bars, 5  $\mu\text{m}$ . **(f)** Quantification of observed  
803 junctional phenotypes at 32 hpf. *rasip1<sup>ubs28</sup>* mutants show significant number of

804 reticulated junctions and collapsed anastomotic rings compared to wild-type (WT  $n=6$   
805 embryos, 53 analyzed rings, mut  $n=8$ , 68, Chi-Square:  $p<0.0001$ .

806

807 **Figure 4: Protracted delays in lumen formation in *rasip1* mutants. (a, b)** Live  
808 images of *Tg(kdrl:EGFP)<sup>s843</sup>; (gata1a:DsRed)<sup>sd2</sup>* embryos. **(a)** Still images of a time-  
809 lapse movies (s-movies 14, 15) starting at 30 hpf. **(b)** Tracking of individual  
810 unlumenized ISV during embryonic development (32 to 96 hpf). Scale bars, 20  $\mu$ m.  
811 **(c)** Percentage of blood carrying ISVs at 96 hpf (WT  $n=3$  embryos, 28 analyzed ISVs,  
812 mut  $n=5$ , 46). Analyzed by unpaired two-tailed Mann-Whitney test and error bars  
813 indicate standard deviation; significance ( $*p < 0.1$ ).

814

815 **Figure 5: Analysis of ectopic luminal pockets during DLAV formation in *rasip1***  
816 **mutants. (a)** Still pictures of time-lapse movies (s-mov 16, 17) showing for the  
817 emergence of ectopic luminal pockets (yellow arrowheads) in *rasip1* mutants. **(b)**  
818 Schematic representation of possible cellular localization of ectopic lumens. To  
819 differentiate between these possibilities two types of experiments: microangiography  
820 (c) and colocalization of luminal pockets with junctional marker (d). **(c)** Visualization of  
821 ectopic lumens and patent lumens in a *rasip1<sup>ubs28</sup>* embryo (36 hpf). Ectopic luminal  
822 pockets are indirectly visualized by the absence of cytoplasmic EGFP (yellow  
823 arrowhead) (*Tg(kdrl:EGFP)<sup>s843</sup>*). The patent lumen is marked by microangiography  
824 using quantum dots in red (third panel in black). Ectopic lumens are not part of the  
825 patent vasculature. **(d)** Still pictures of time-lapse movie (s-mov 18-21) during lumen  
826 formation in the DLAV from around 32 hpf onward in wild-type (top) and *rasip1<sup>ubs28</sup>*  
827 (bottom) embryos. Endothelial cells are labeled with mRFP (greyscale images),



828 junctions are labeled by VE-cad-Venus (merged images). Yellow arrowheads indicate  
829 the ectopic luminal pockets in a *rasip1* mutant. Scale bar, 5  $\mu$ m.

830

831 **Figure 6: Apical to junctional re-localization of Rasip1 during blood vessel**  
832 **fusion. (a-c)** Immunofluorescent labeling of Rasip1 and VE-cadherin during different  
833 stages of DLAV formation (30 to 36 hpf). At 32hpf, Rasip1 is restricted to the apical  
834 surface of the anastomotic ring (yellow arrowheads). At 36hpf, Rasip1 localizes to  
835 endothelial junctions (VE-cadherin, white arrowheads). Scale bars, 20  $\mu$ m (overview)  
836 and 5  $\mu$ m (inset).

837

838

839 **Figure 7: Phenotypic comparison of *radil-b* single and of *rasip1/radil-b* double**  
840 **mutants suggests partially overlapping functions during vascular**  
841 **morphogenesis. (a)** Immunofluorescence analysis of Zo-1 and VE-cadherin  
842 distribution in *Tg(kdrl:EGFP)<sup>s843</sup>* at 32 hpf. **(b)** Live images at 48 hpf using *Tg(ve-*  
843 *cad:ve-cadVENUS)*; *Tg(fliiep:gal4ff)<sup>ubs3</sup>*; *(UAS:mRFP)* reporter lines. Scale bars: 20  
844  $\mu$ m

845

846 **Figure 8: Loss of Ccm1 and Heg1 phenocopies aspects of *rasip1* mutants. (a)**  
847 Live images of *Tg(kdrl:EGFP)<sup>s843</sup>*; *(gata1:Dsred)<sup>sd2</sup>* at 72 hpf. *ccm1* and *heg1*  
848 morphants display mesenphalic hemorrhages while cranial circulation appears  
849 completely disrupted. In addition, the MsV (Mesencephalic veins) and DLV (dorsal  
850 longitudinal vein) (yellow arrowheads) are malformed. Scale bar, 50  $\mu$ m. **(b)** Live  
851 images of control, *ccm1* and *heg1* morphants at 32 hpf. *ccm1* and *heg1* morphants  
852 show reduced DA diameters and defective ISV formation. Scale bar, 20  $\mu$ m. **(c)**

853 Immunofluorescence analysis of control, *Ccm1* and *Heg1* morphants at 32 hpf.  
854 Transgenic *Tg(kdr:EGFP)<sup>s843</sup>* embryos were stained for VE-cadherin. Scale bar, 5  $\mu$ m.  
855 **(d)** Quantification of multicellular ISVs at 48 hpf (Control MO injected embryos  $n=5$ ,  
856 24 analyzed ISVs; *Ccm1* MO  $n=4$ , 26; *Heg1* MO  $n=5$ , 23). Analyzed by unpaired two-  
857 tailed Mann-Whitney test and error bars indicate standard deviation; significance (\*\*p  
858 < 0.01).

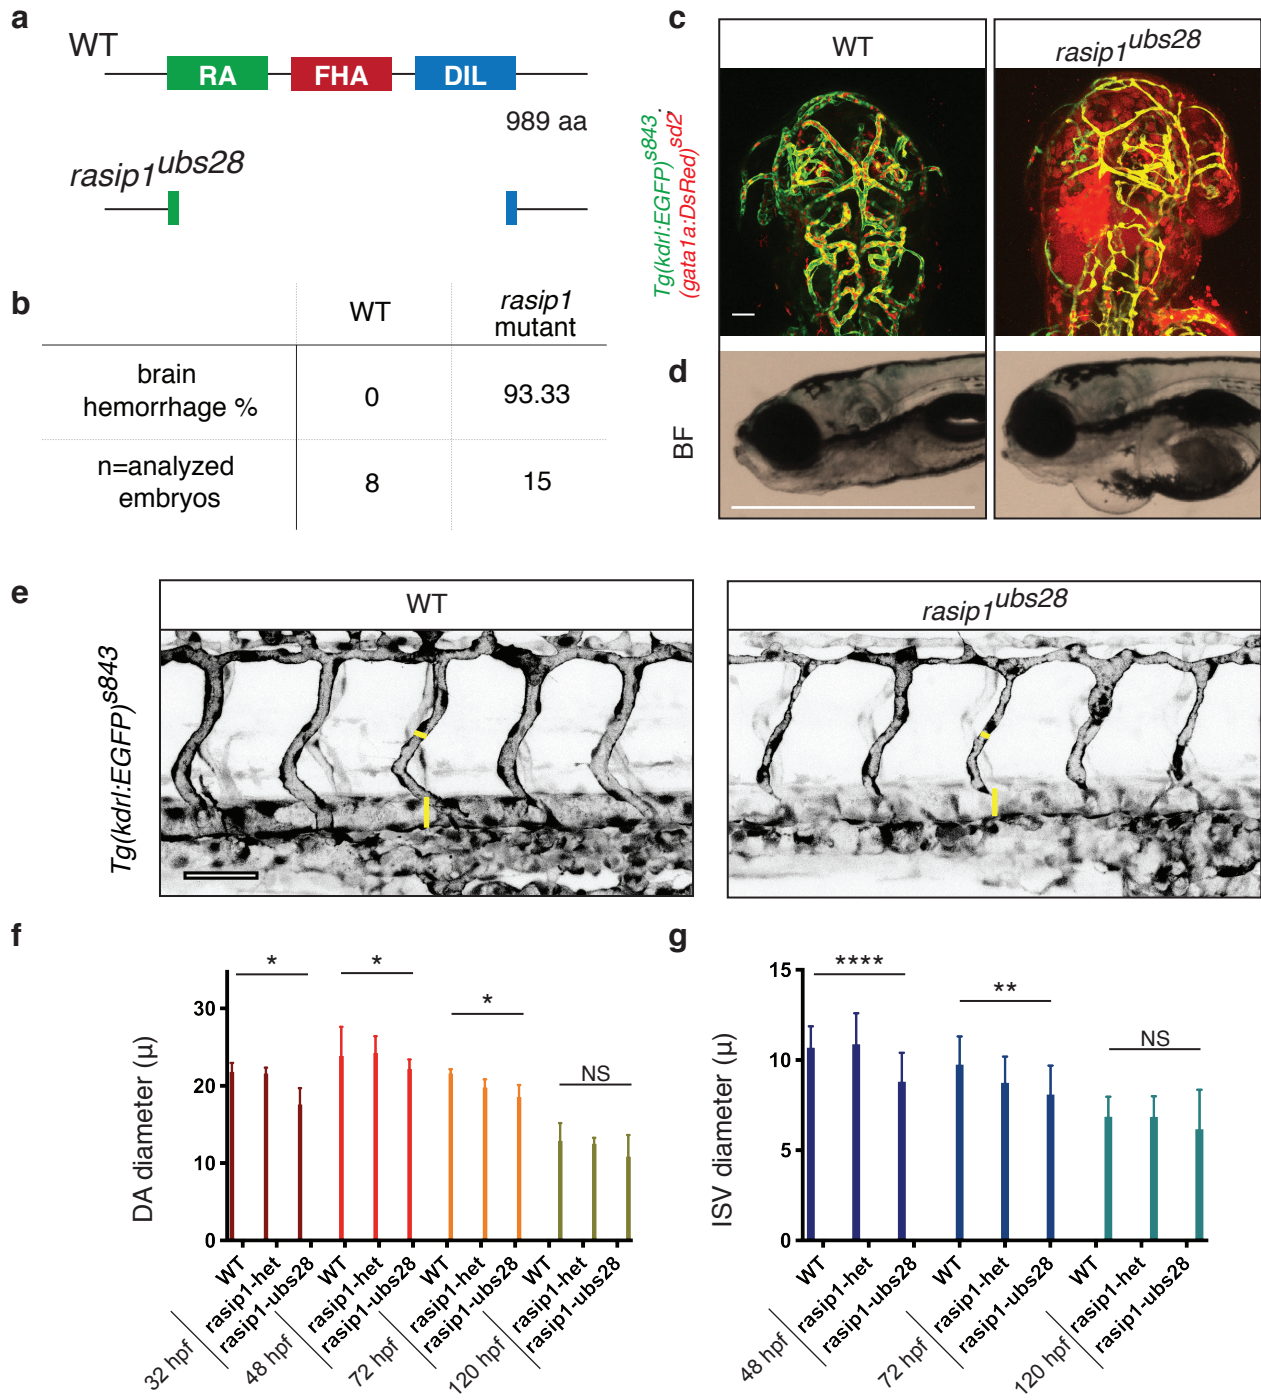

Figure 1

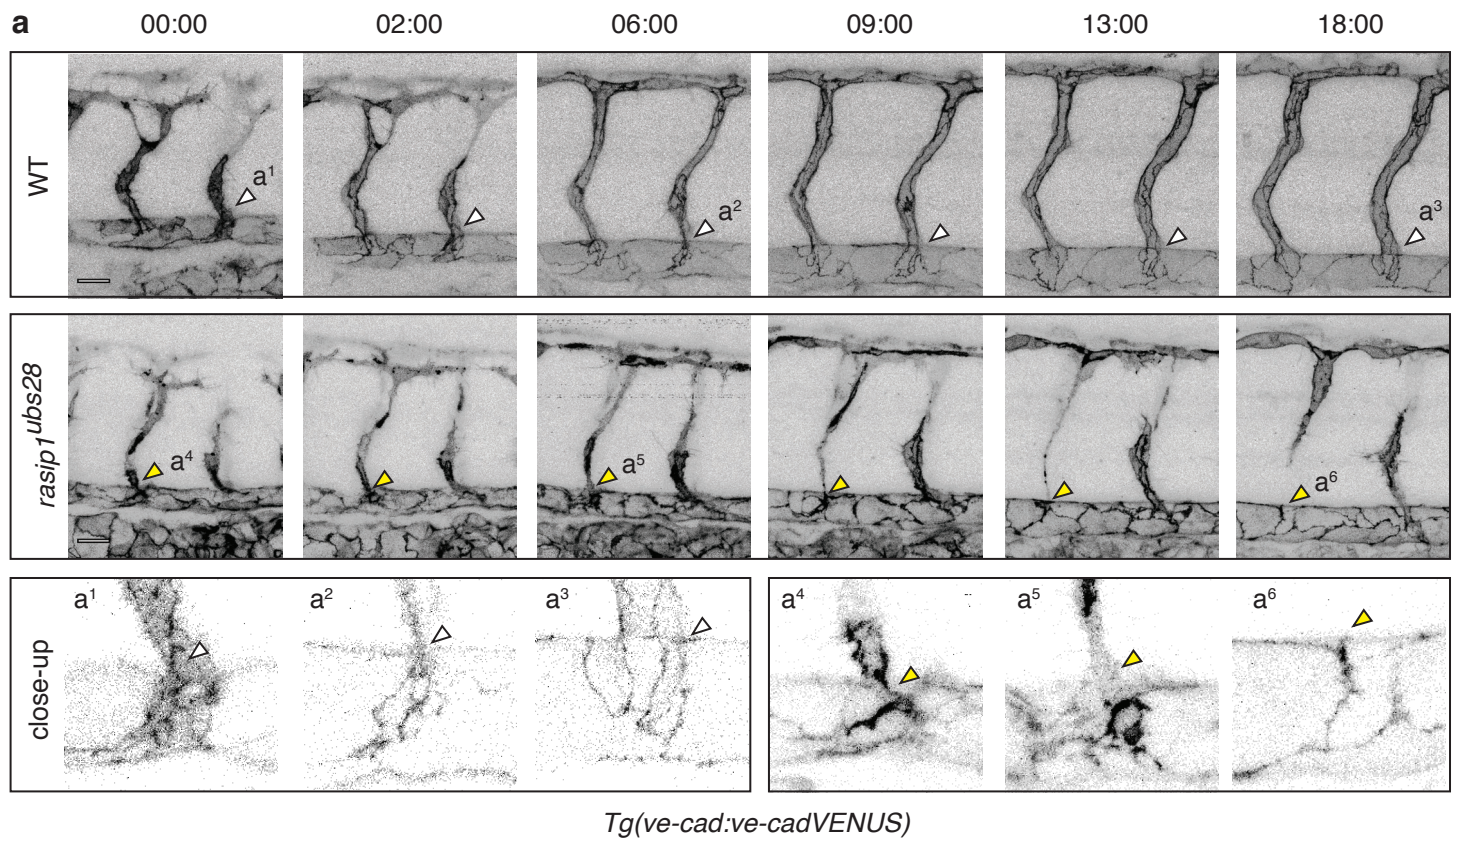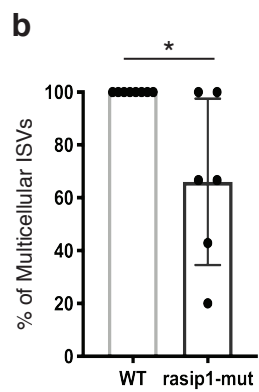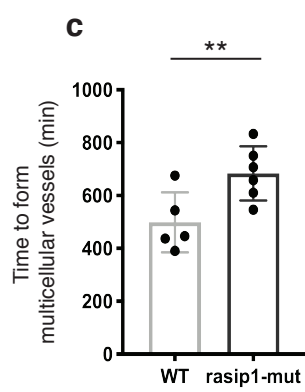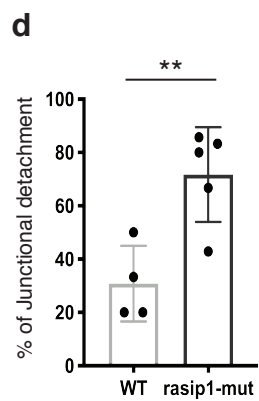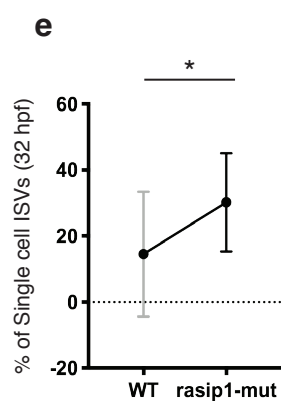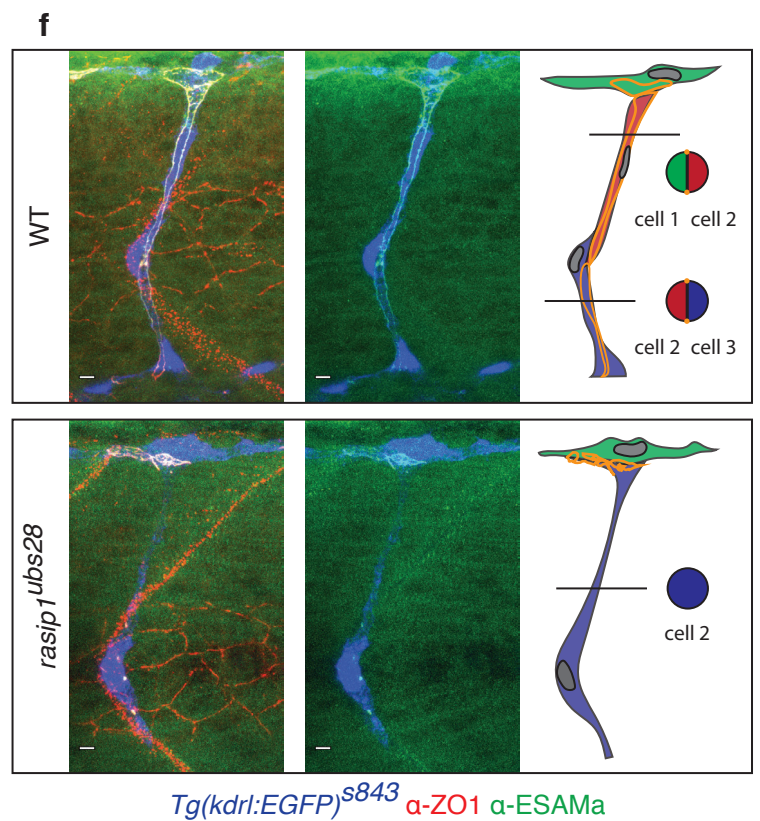

Figure 2

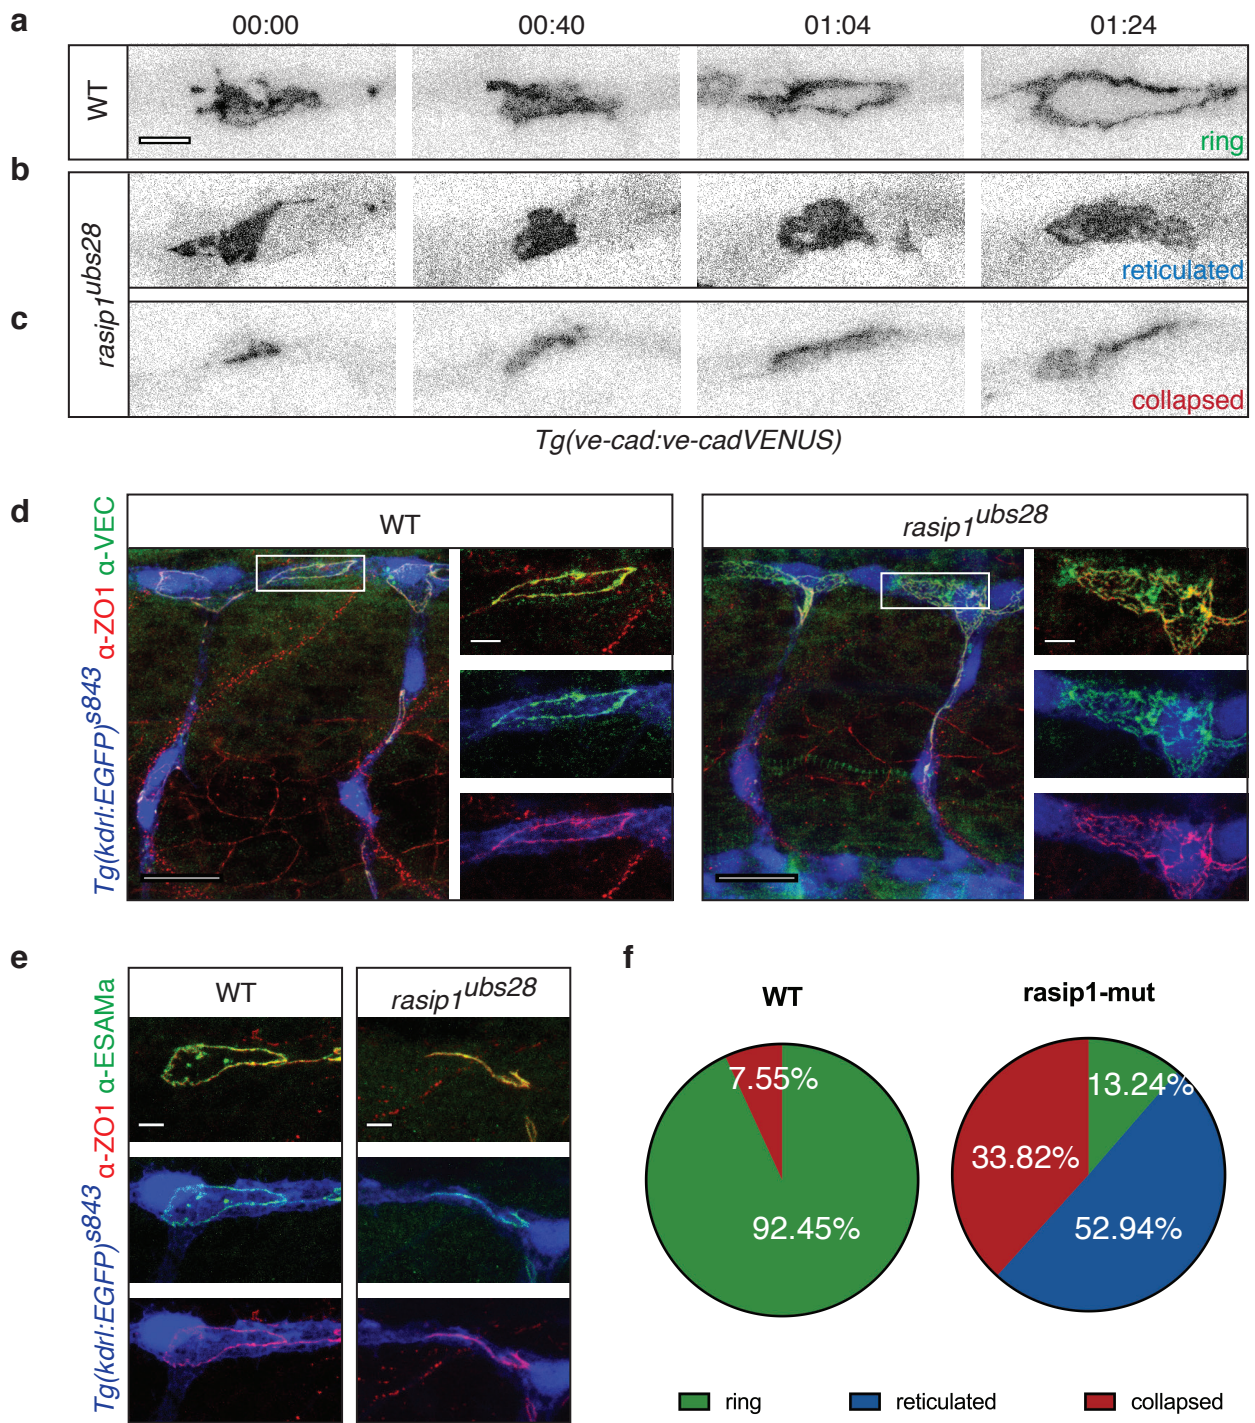

Figure 3

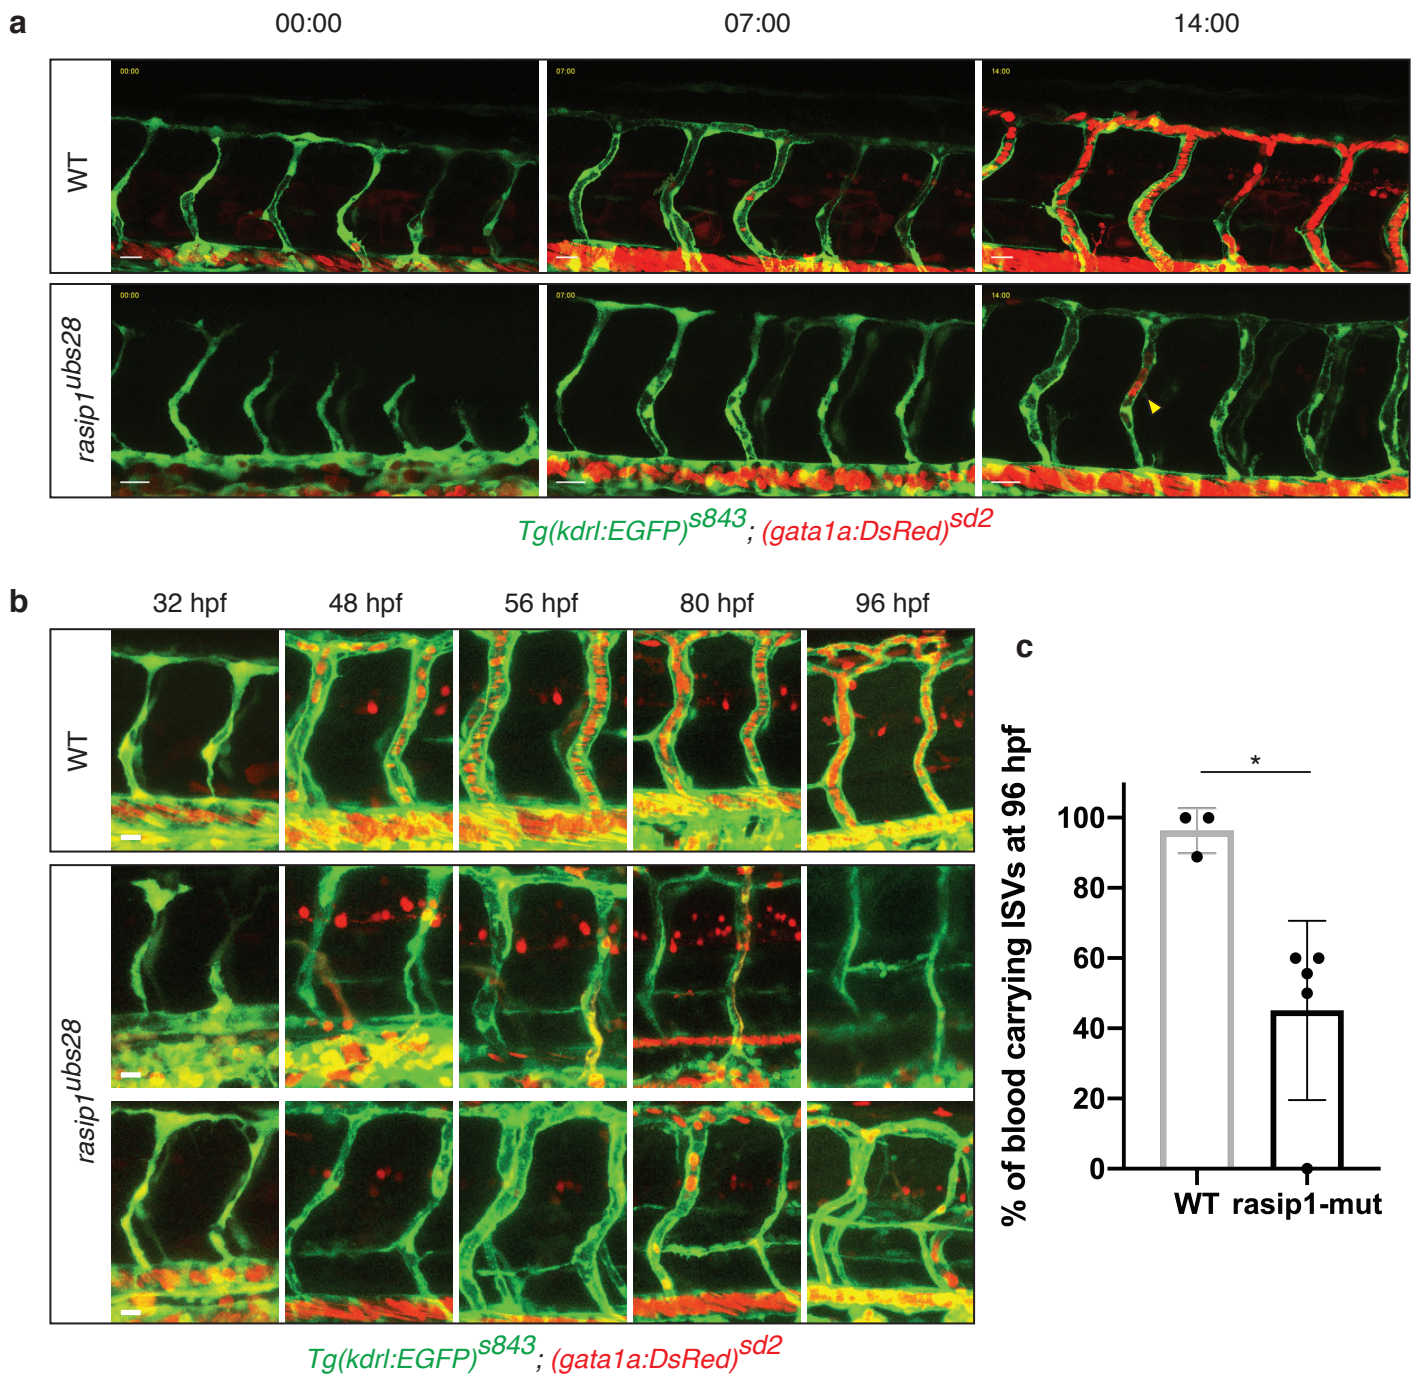

Figure 4

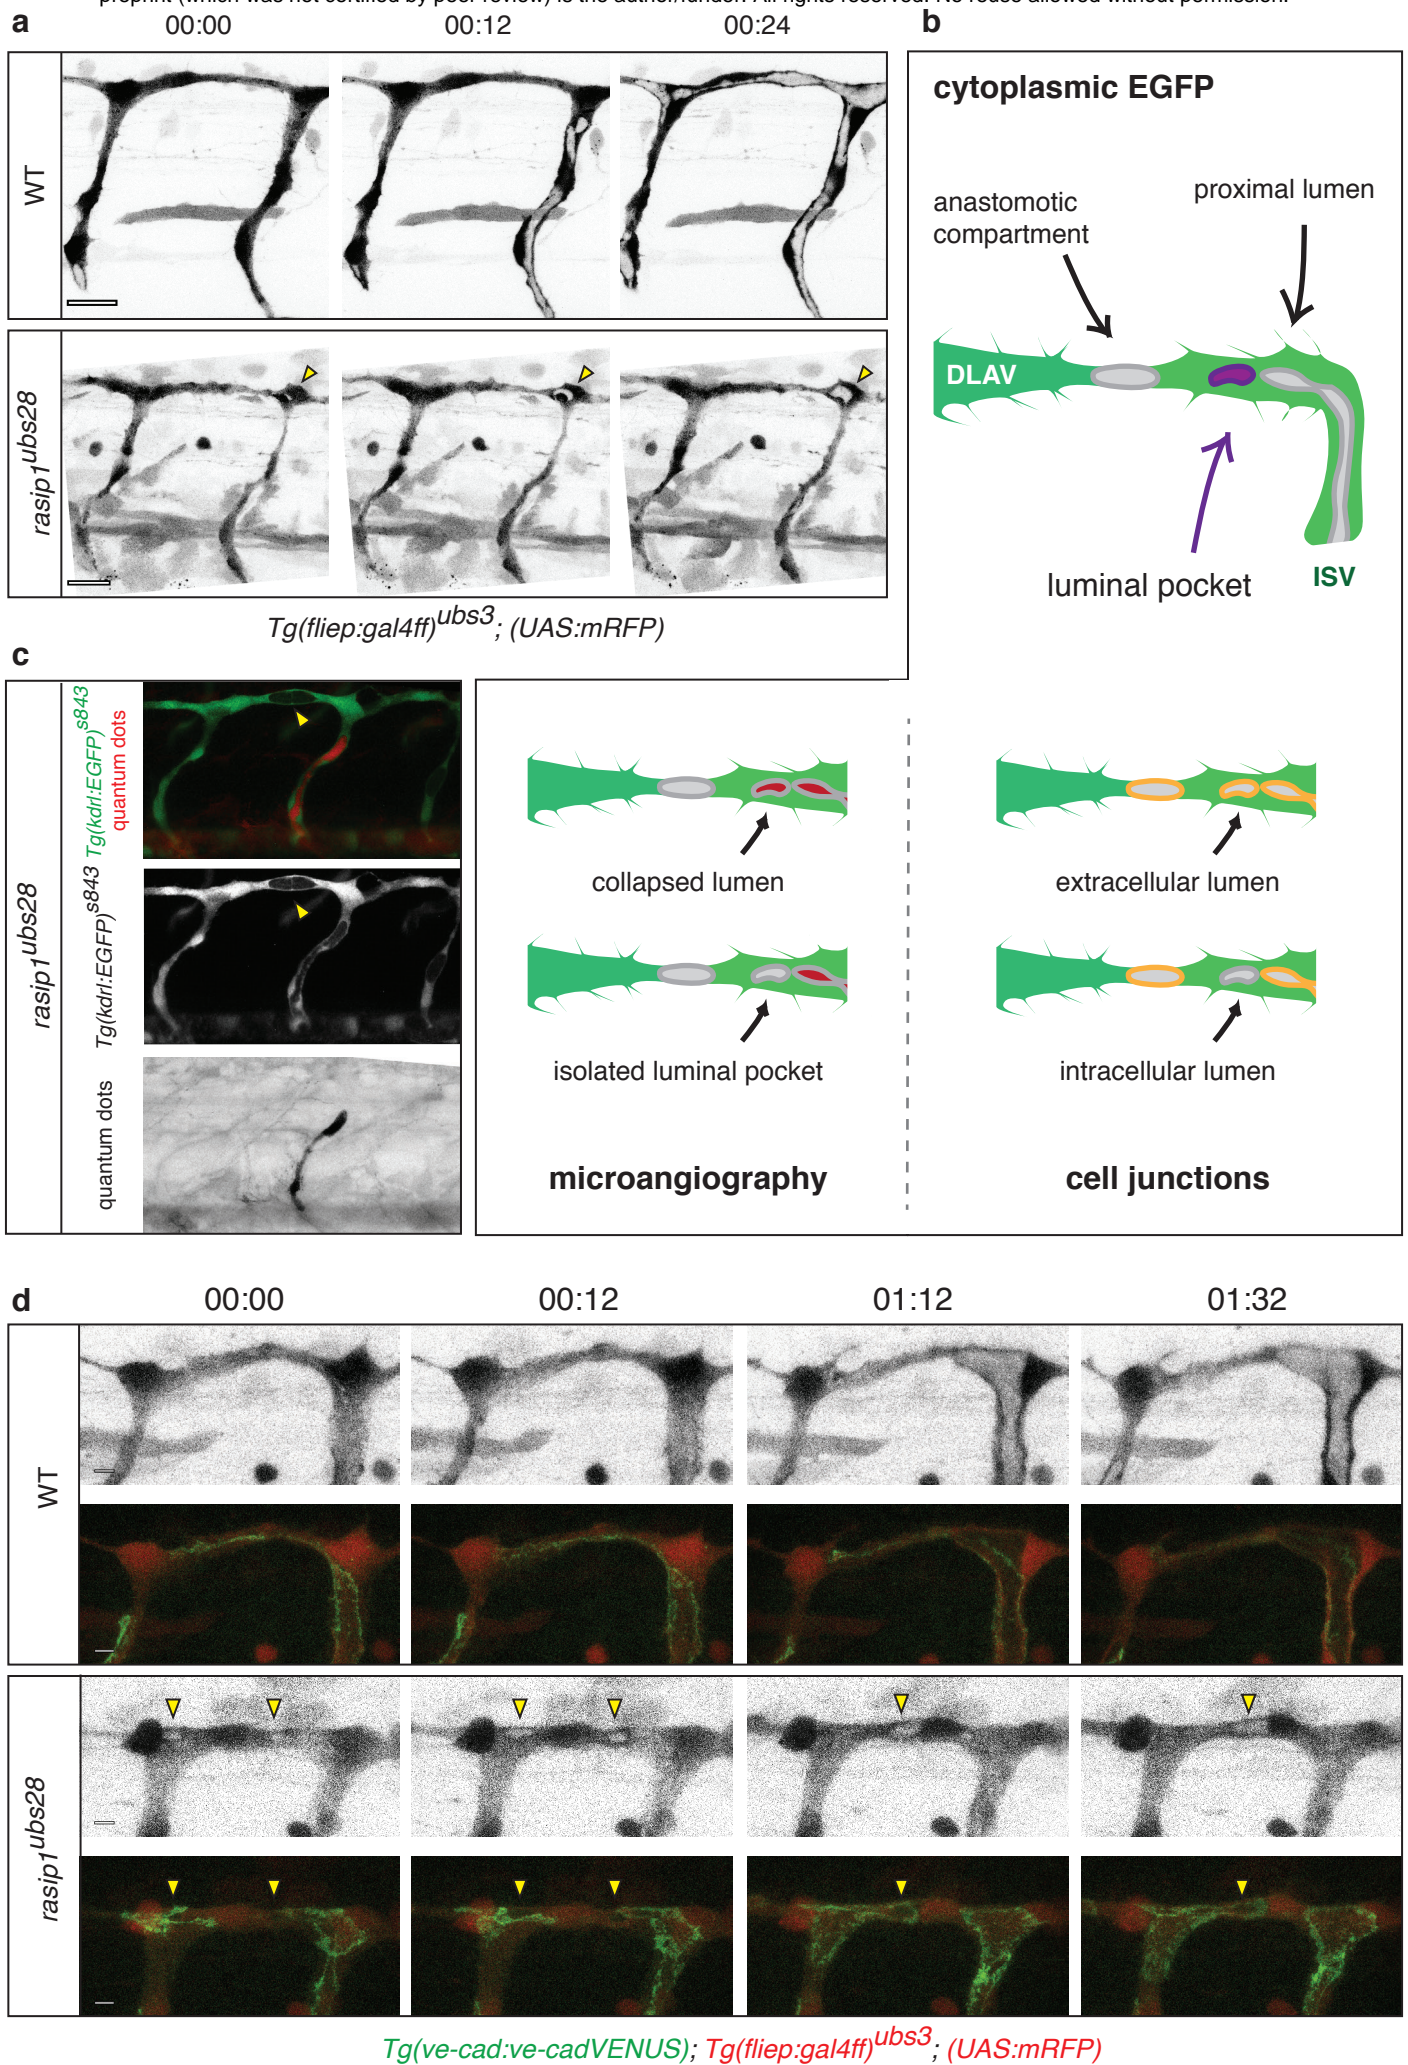

Figure 5

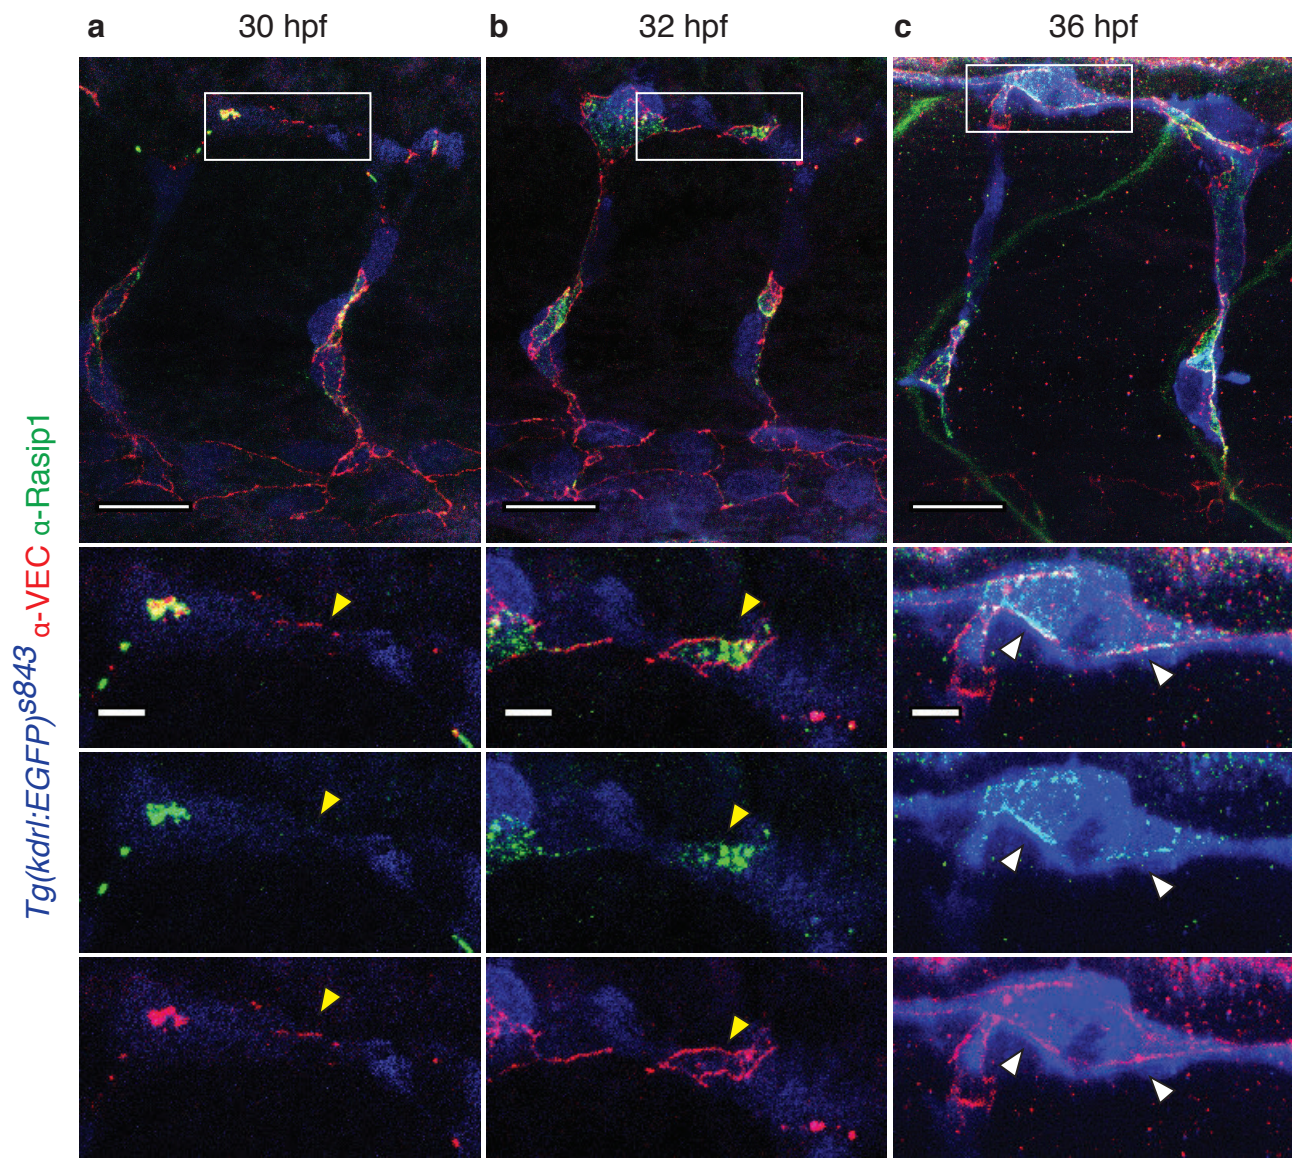

Figure 6



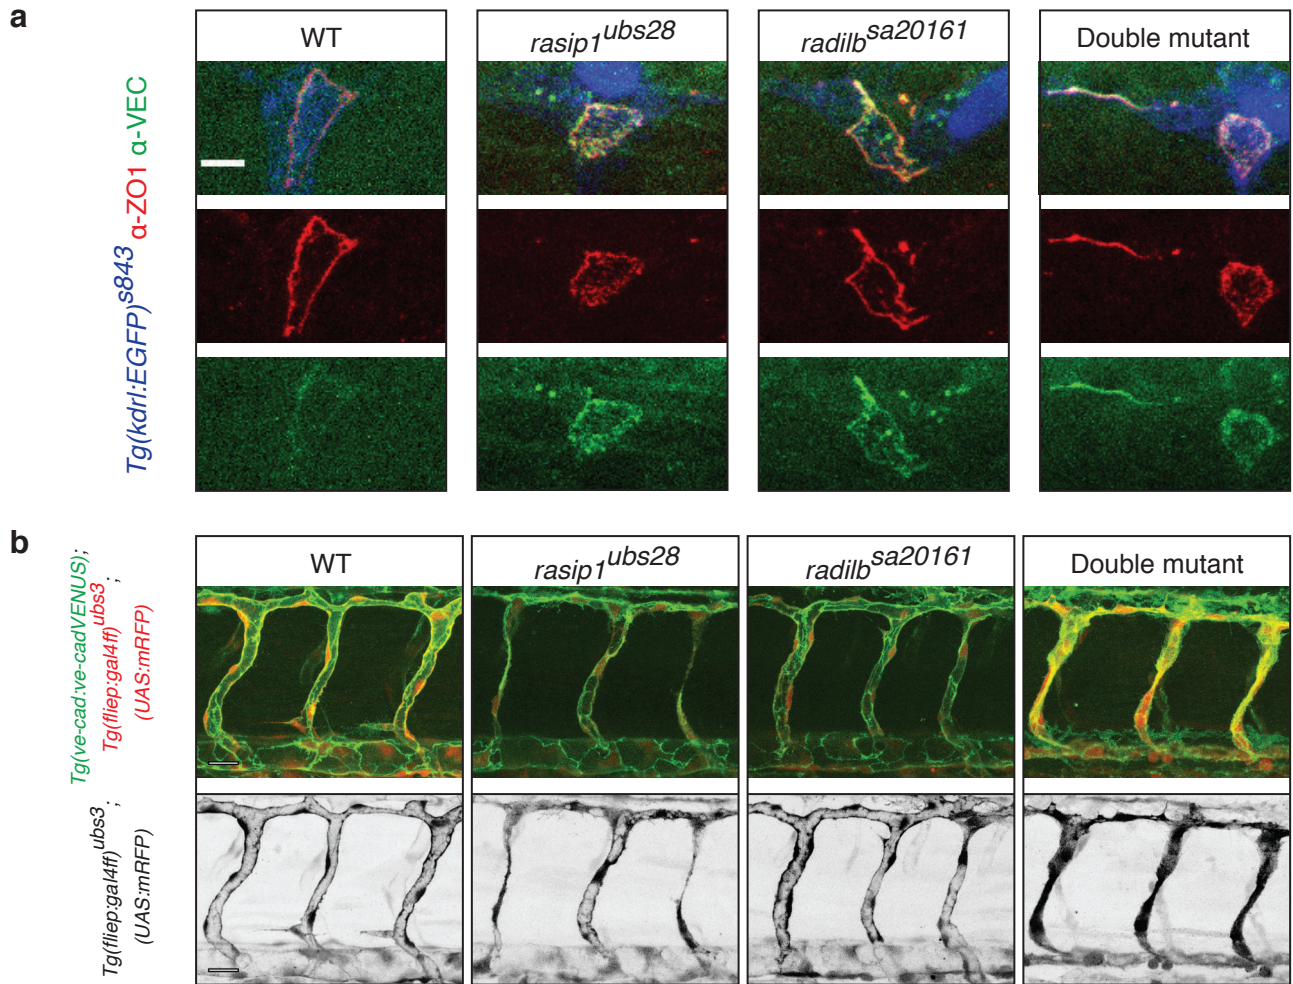

Figure 7

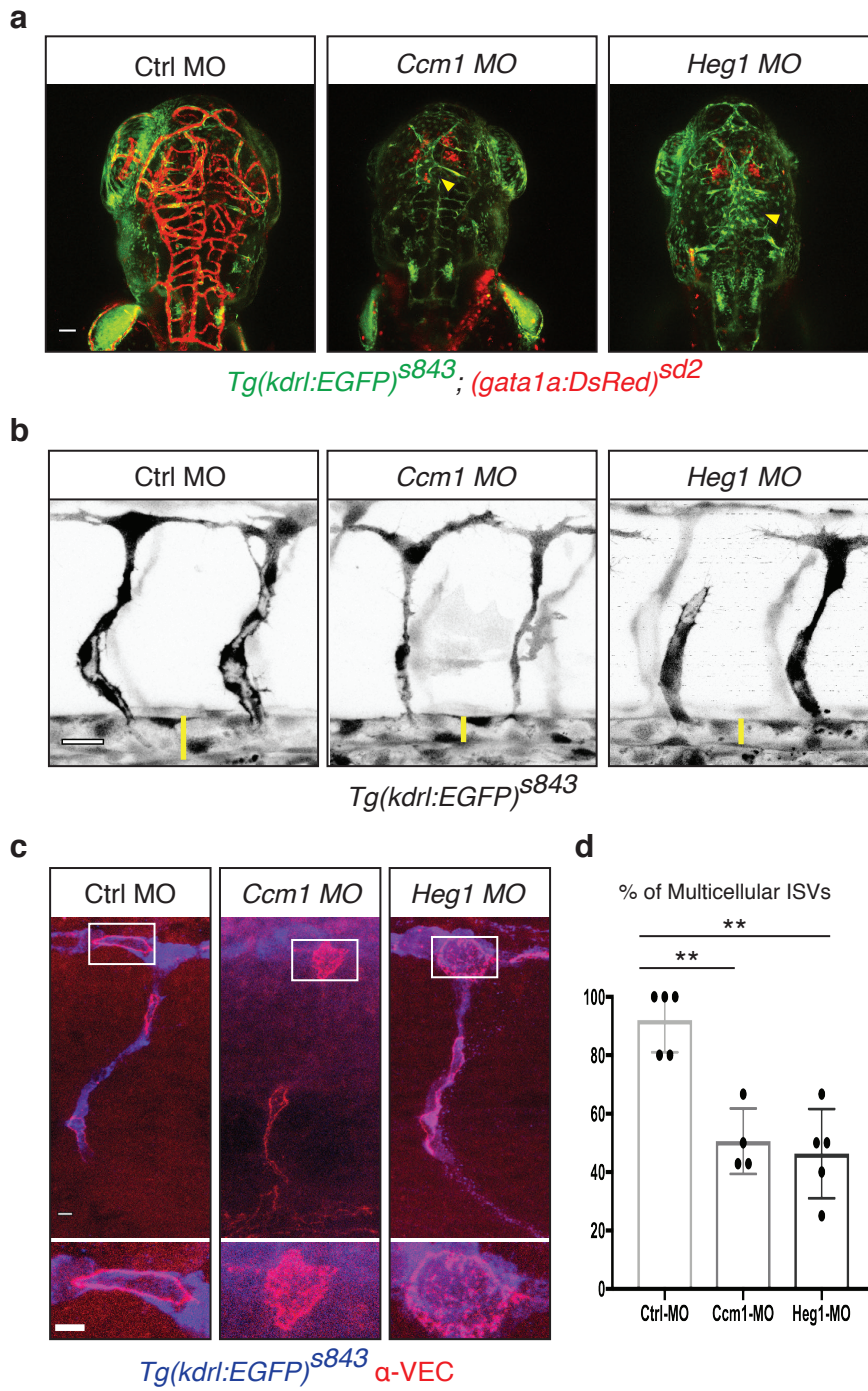

Figure 8
