# Supplementary material for: Control of dynamic cell behaviors during angiogenesis and anastomosis by Rasip 1
Source: bioRxiv or medRxiv preprint supplement (doi:10.1101/2020.08.27.269977), 2020-09-15
Supplement: Supplementary file [file media-1.pdf]

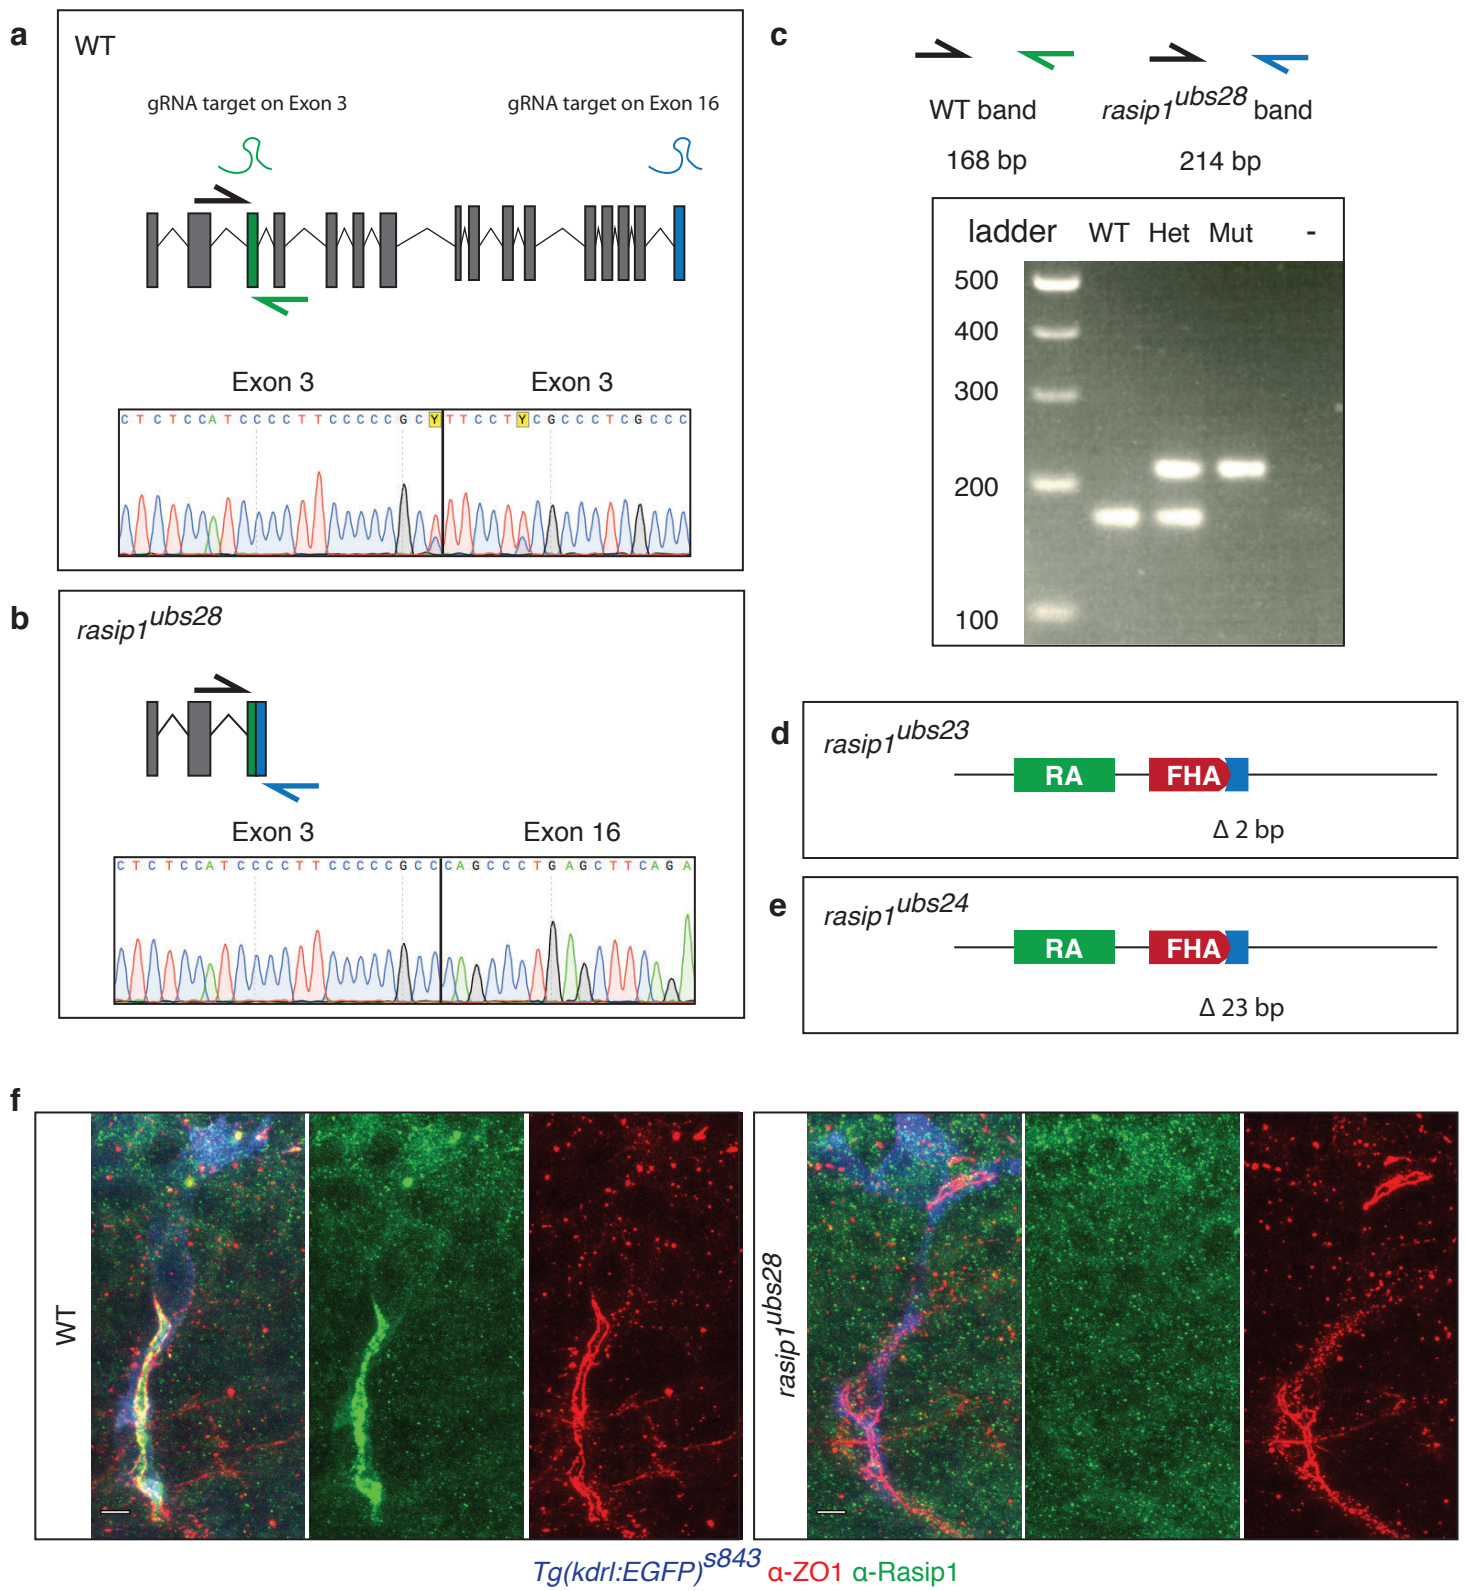

Supplementary Figure 1

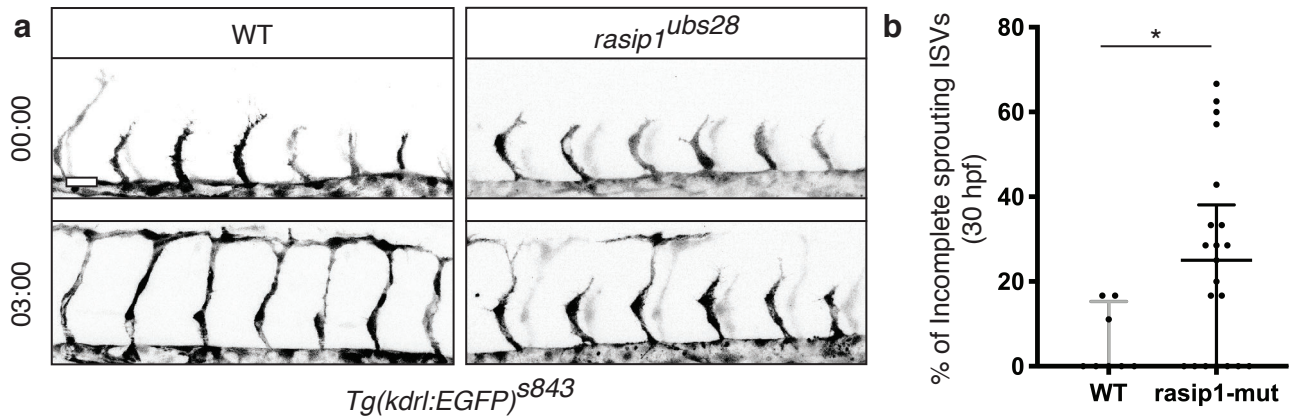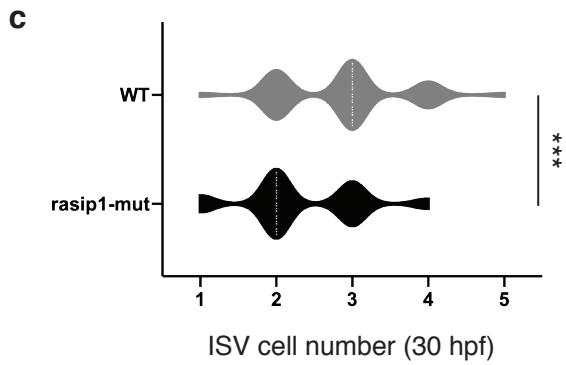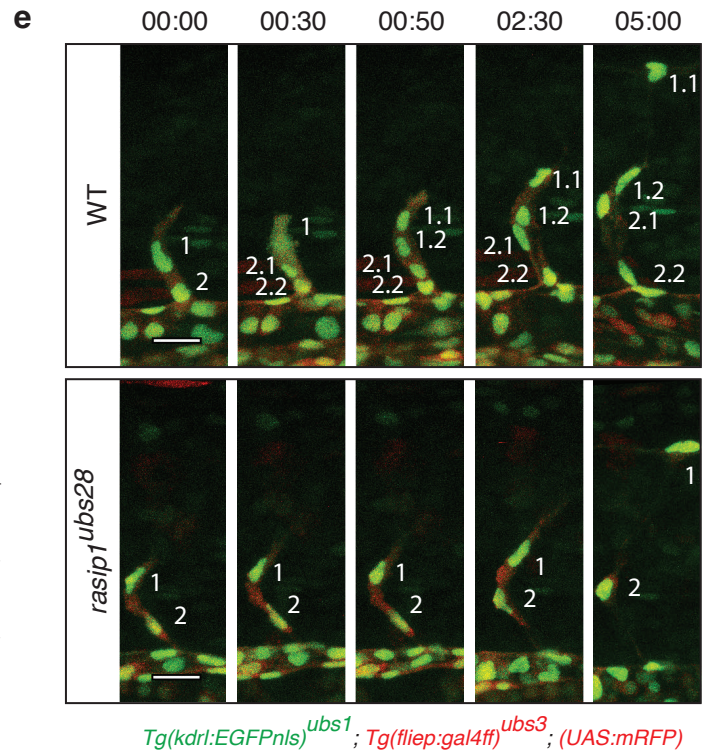

**d**

| from 24 to 30 hpf   | WT    | <i>rasip1</i> mutant |
|---------------------|-------|----------------------|
| % of cell divisions | 63.16 | 28                   |
| n = embryos         | 4     | 5                    |
| n = analyzed ISVs   | 19    | 25                   |

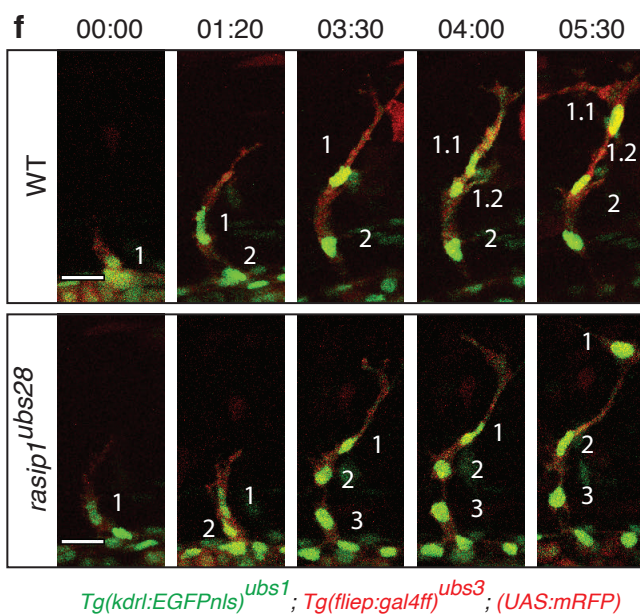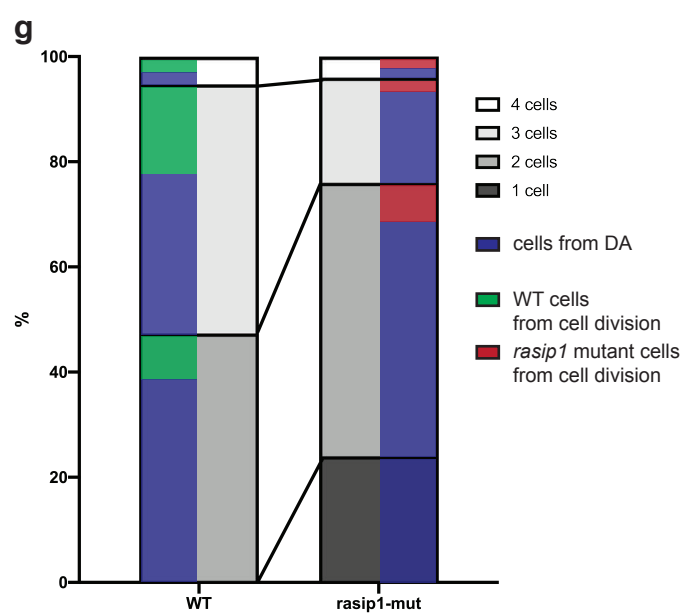

Supplementary Figure 2

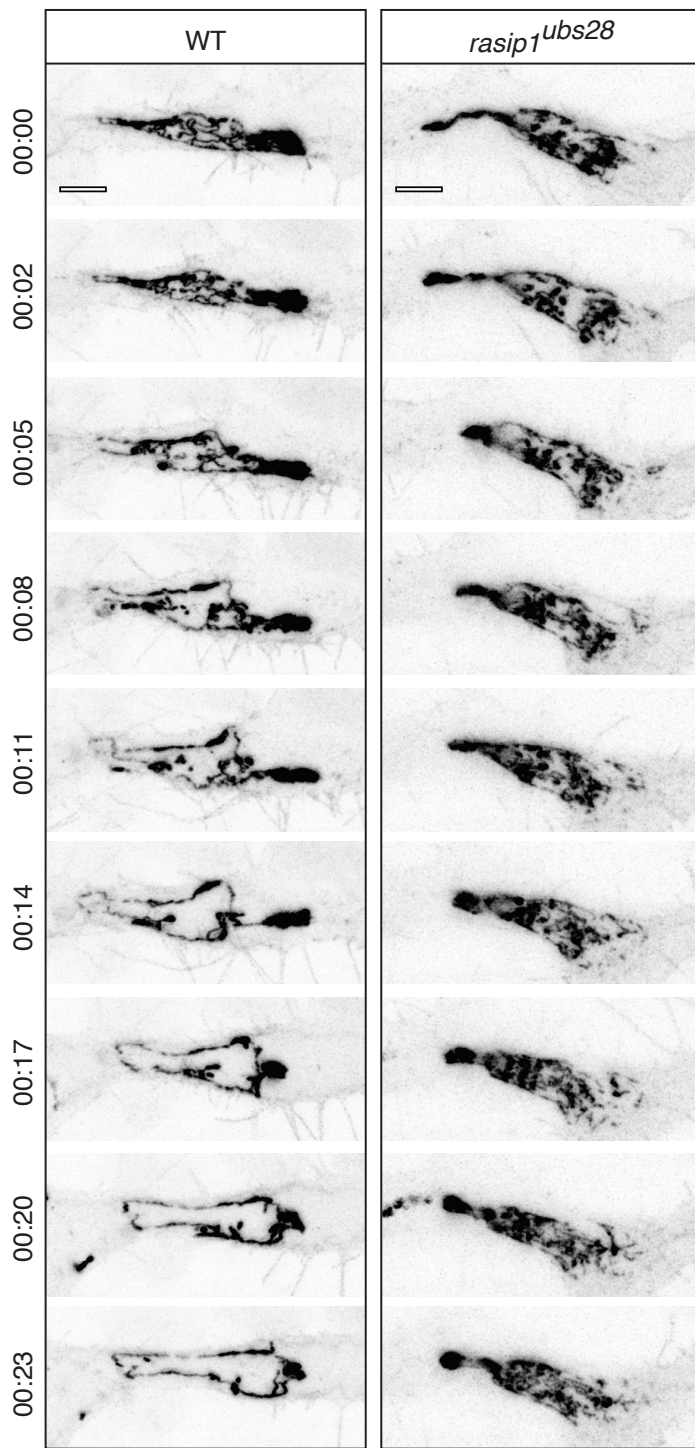

Supplementary Figure 3

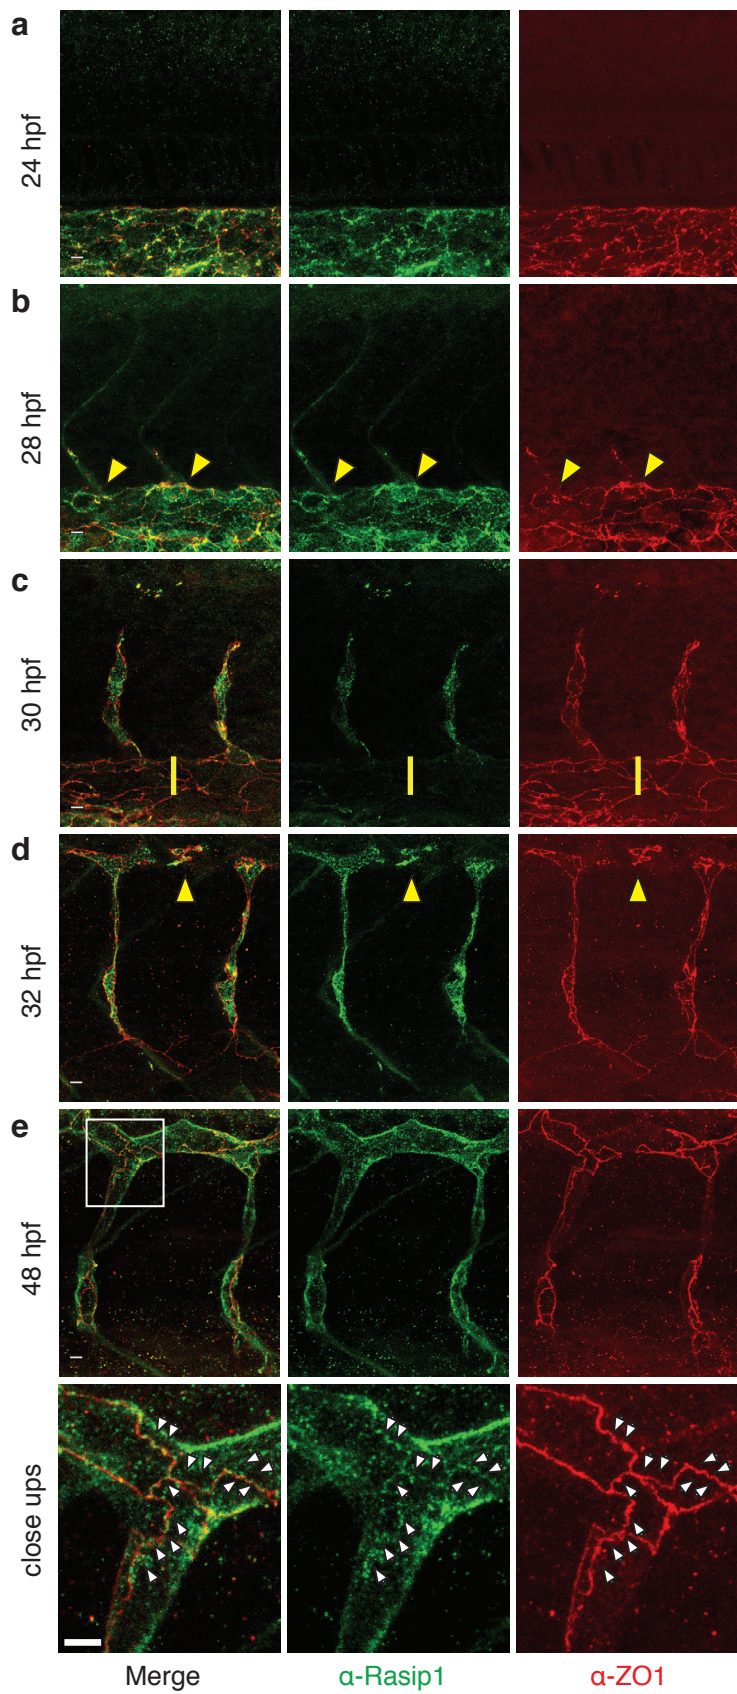

Supplementary Figure 4

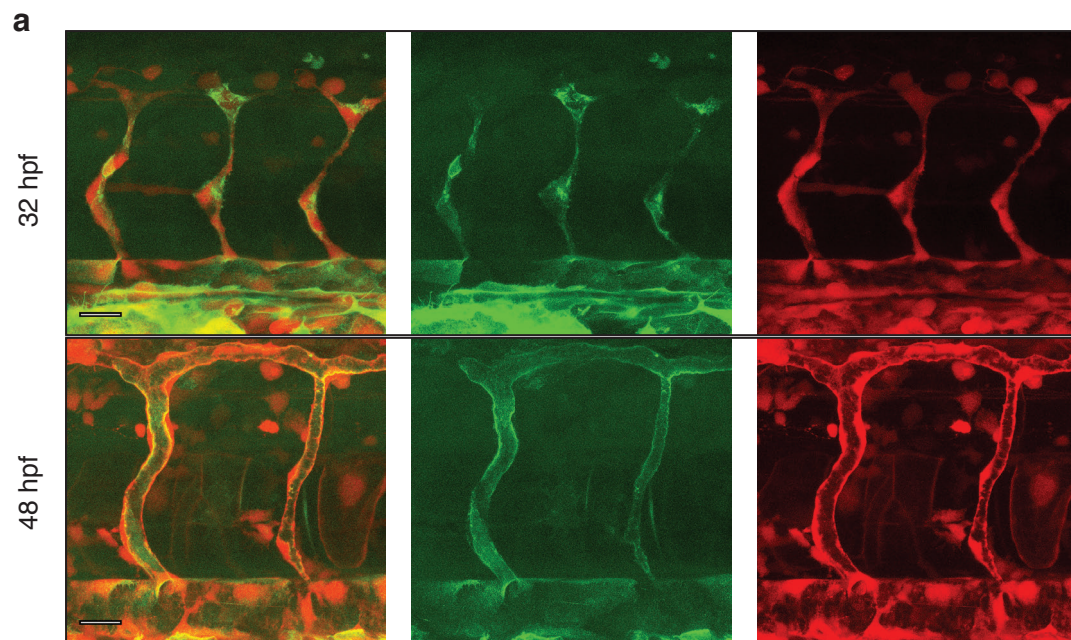

*Tg(flied:gal4ff)<sup>ubs3</sup>; (UAS:EGFPpdxl)<sup>ubs29</sup>; (UAS:mRFP)*

**b**

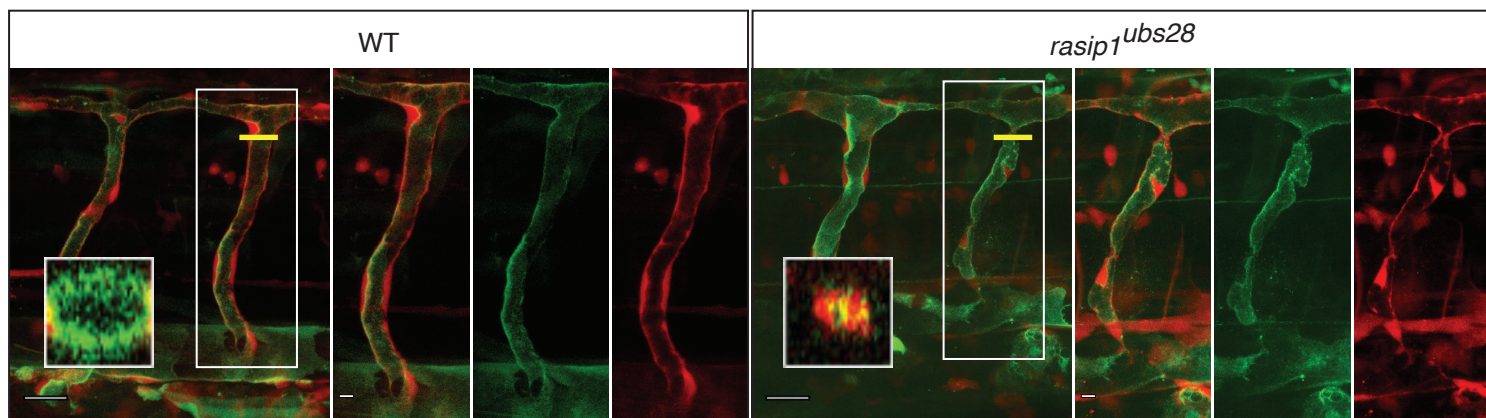

*Tg(flied:gal4ff)<sup>ubs3</sup>; (UAS:EGFPpdxl)<sup>ubs29</sup>; (UAS:mRFP)*

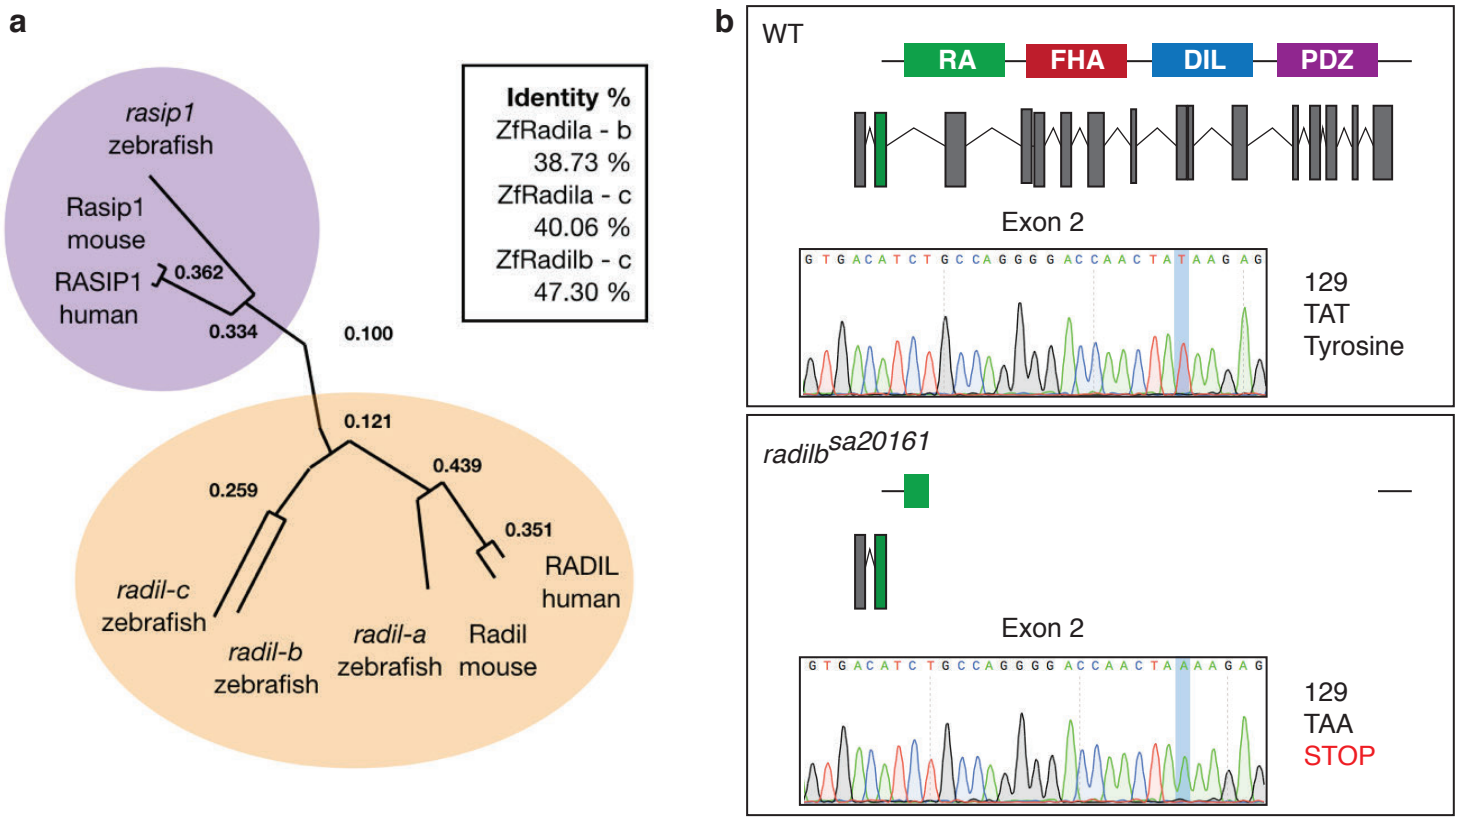

**c**

| 72 hpf             | WT | <i>rasip1</i> mut | <i>radilb</i> mut | <i>double</i> mut |
|--------------------|----|-------------------|-------------------|-------------------|
| brain hemorrhage % | 0  | 93.33             | 87.5              | 87.5              |
| n=analyzed embryos | 8  | 15                | 16                | 8                 |

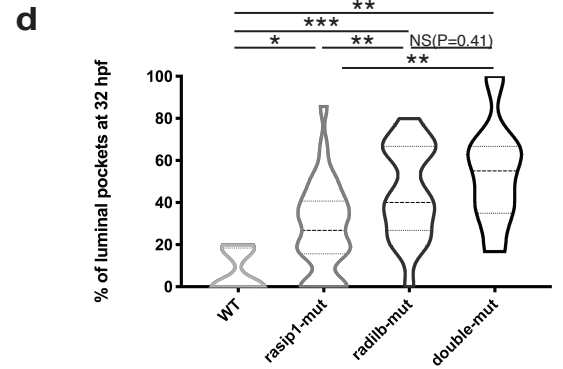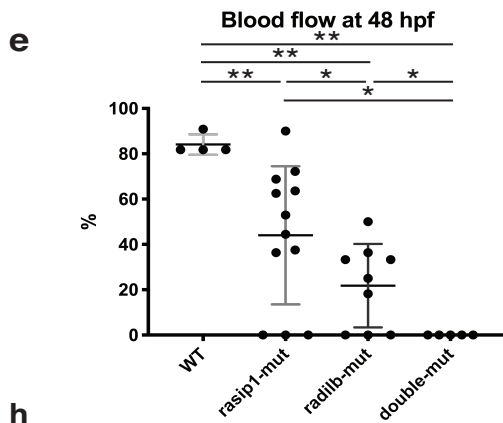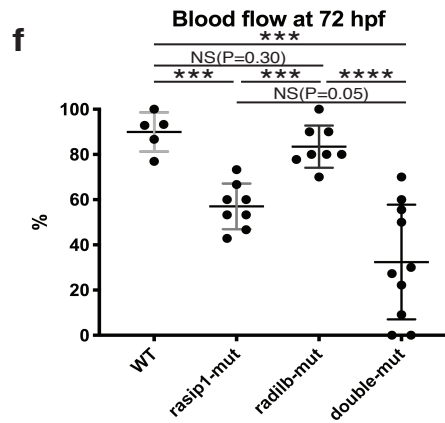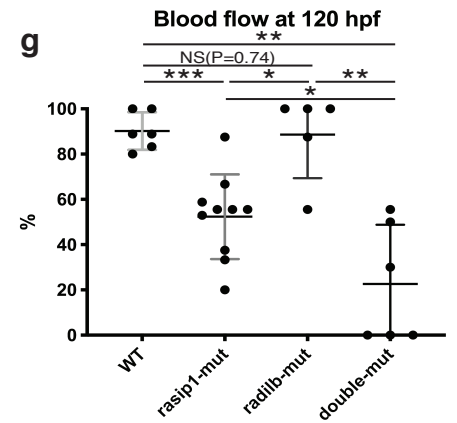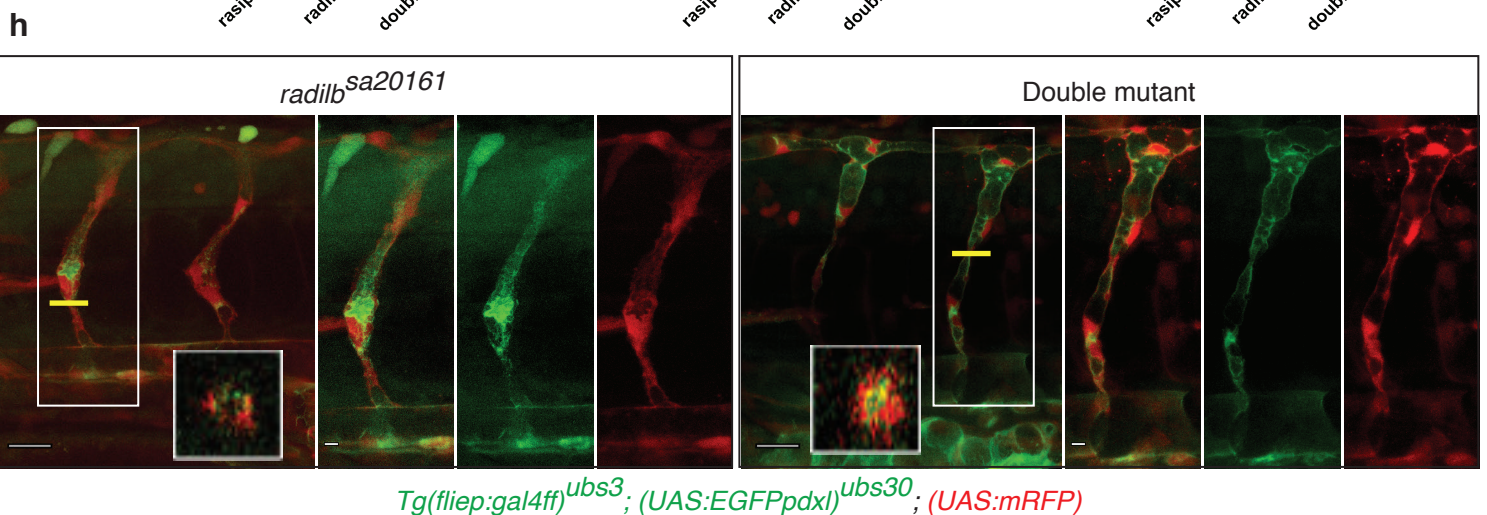

Supplementary Figure 6

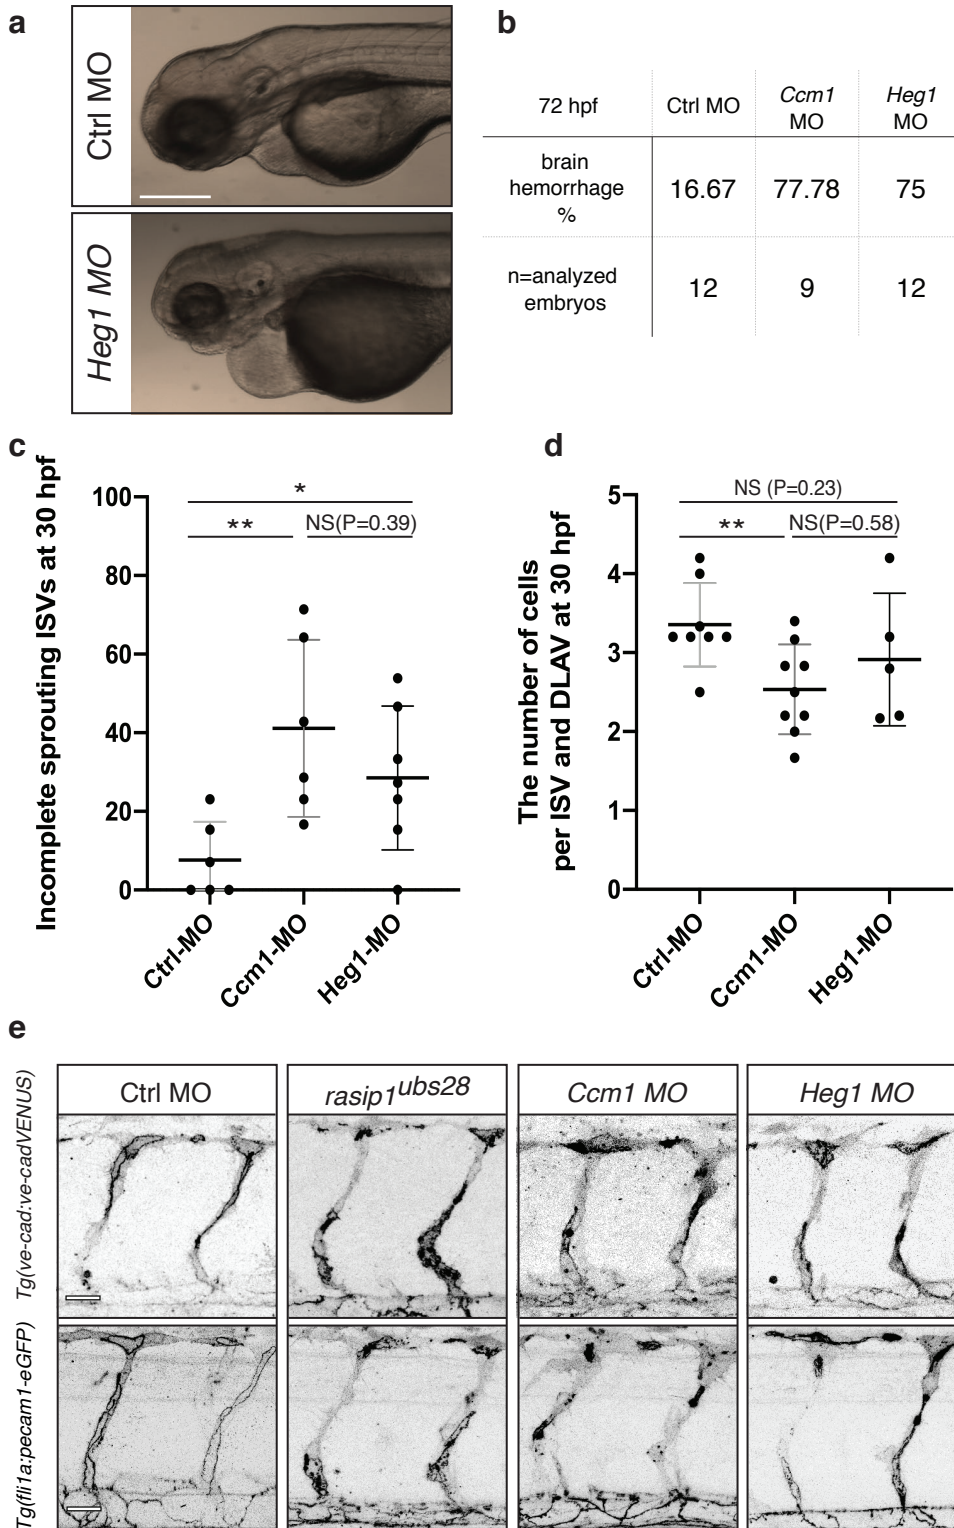

# 1 Supplemental Experimental Procedures

## 2 **Generation of *rasip1* mutant alleles**

3 For this study, three *rasip1* mutant alleles were generated. Two gRNA sites were  
4 selected for a null mutant (*rasip1<sup>ubs28</sup>* mutant) using an online tool  
5 <http://www.crisprscan.org> (Moreno-Mateos et al., 2015) based on a high score:

6 Cris6 (GGCGGGGGAAGGGGATGGAGAGG, exon3, score 101) and

7 Cris7 (TGAAGCTCAGGGCTGGGGATTGG, exon16, score 63).

8 For *rasip1<sup>ubs23</sup>* and *rasip1<sup>ubs24</sup>* mutant, target sites were chosen:

9 Cris1 (GGAATGTCCCTTACAGCTGGTGG, exon3),

10 Cris2 (GGCGGGGGAAGGGGATGGAGAGG, exon 2),

11 Cris3 (GGACAAGACAGGTAGCGGAGGGG, exon12),

12 Cris4 (GGTGGAGTGAGAGAGGGAGG, exon2) and

13 Cris5 (GGCGGGACGGGAGTCACACGCGG, exon7).

14 gRNAs/Cas9 injections were performed according to (Gagnon et al., 2014). gRNAs  
15 were cloned into vector DR274. Injection mix: 1 µl Cas9 protein 6 mg/ml; 0.5 µl KCl  
16 2M, 1 µl gRNA (around 1 µg/µl). Mutants were identified by sequencing the genomic  
17 target region.

18

## 19 **Genotyping of *rasip1* and *radil-b* mutant alleles**

20 *rasip1* and *radil* mutants were identified by multiplex-PCR using combinations of non-  
21 specific and allele-specific primers according to (Sauteur et al., 2014). Primer  
22 sequences are as follows:

| Primer   | Name       | Sequence (5'-3')      |
|----------|------------|-----------------------|
| Rasip1-1 | Rasip1-fwd | TGTTGCCATCAGATCCACCAC |



|          |                     |                              |
|----------|---------------------|------------------------------|
| Rasip1-2 | Rasip1-wt-rev       | TTGGCCCGGGATTGCTGATT         |
| Rasip1-3 | Rasip1-ubs28-rev    | GTCCGCTGATTAGCAGGAAGT        |
| Radilb-1 | Radil-b-fwd         | CCACAACAACCGGCTAACCAC        |
| Radilb-2 | Radil-b-rev         | ACAATGAGCCTGGGTTGCAAATA<br>A |
| Radilb-3 | Radil-b-wt-fwd      | TGGCCAGCACACTCTTTT           |
| Radilb-4 | Radil-b-sa20161-rev | GCCAGGGGACCAACTATA           |

23

#### 24 **Phylogenetic comparison of Rasip1 and Radil homologues**

25 The analysis was carried out using using the online program *phylo.io*  
26 (<http://dev.phylo.io/#>)(Robinson et al., 2016). The following peptide sequences were  
27 used: *Mus musculus* (mouse) Rasip1: ENSMUSG00000044562, *Homo sapiens*  
28 (human) Rasip1: ENSG00000105538, *Danio rerio* (zebrafish) Rasip1:  
29 ENSDART00000155407.3, *Mus musculus* (mouse) Radil: ENSMUSG00000029576,  
30 *Homo sapiens* (human) Radil: ENSG00000157927, *Danio rerio* (zebrafish) *radil-a*:  
31 ENSDARP00000101722, *radil-b*: ZDB-GENE-130530-682 si:ch73-281f12.4, *radil-c*:  
32 ZDB-GENE-121214-224 si:ch211-176g6.2.

33

34 **Supplementary References**

35

36 Gagnon, J.A., Valen, E., Thyme, S.B., Huang, P., Ahkmetova, L., Pauli, A.,  
37 Montague, T.G., Zimmerman, S., Richter, C., Schier, A.F., 2014. Efficient  
38 Mutagenesis by Cas9 Protein-Mediated Oligonucleotide Insertion and Large-  
39 Scale Assessment of Single-Guide RNAs. *PLoS ONE* 9, e98186–8.

40 doi:10.1371/journal.pone.0098186

41 Moreno-Mateos, M.A., Vejnar, C.E., Beaudoin, J.-D., Fernandez, J.P., Mis, E.K.,  
42 Khokha, M.K., Giraldez, A.J., 2015. CRISPRscan: designing highly efficient  
43 sgRNAs for CRISPR-Cas9 targeting in vivo. *Nat Methods* 12, 982–988.

44 doi:10.1038/NMETH.3543

45 Robinson, O., Dylus, D., Dessimoz, C., 2016. Phylo.io: Interactive Viewing and  
46 Comparison of Large Phylogenetic Trees on the Web. *Molecular Biology and*  
47 *Evolution* 33, 2163–2166. doi:10.1093/molbev/msw080

48 Sauter, L., Krudewig, A., Herwig, L., Ehrenfeuchter, N., Lenard, A., Affolter, M.,  
49 Belting, H.-G., 2014. Cdh5/VE-cadherin Promotes Endothelial Cell Interface  
50 Elongation via Cortical Actin Polymerization during Angiogenic Sprouting.

51 *CellReports* 9, 504–513. doi:10.1016/j.celrep.2014.09.024

52

## 53 Supplementary Figure legends

54 **S-Figure 1: Characterization of *rasip1* mutants.** (a, b) Genomic organization of the  
55 *rasip1* locus in wild-type (a) and *rasip1<sup>ubs28</sup>* mutants (b). *rasip1* is encoded by 16 exons.  
56 gRNAs for CRISPR/Cas9 were designed to target exon3 and exon16. The wild-type  
57 DNA sequence of exon3 is shown. The *rasip1<sup>ubs28</sup>* mutant, which consists of a large  
58 deletion from exon 3 to exon 16, is lacking all exons encoding the three conserved  
59 protein domains. (c) PCR strategy to screen for *rasip1* mutant embryos or fish. (d, e)  
60 Schematic representation two additional mutant alleles, *rasip1<sup>ubs23</sup>* and *rasip1<sup>ubs24</sup>*. (f)  
61 Immunofluorescence staining of Rasip1 (green) in the zebrafish vasculature (32hpf). The  
62 anti-zf-Rasip1 antibody is directed against the C-terminal domain of the protein (see  
63 Materials and Methods). The endothelium is labeled by *Tg(kdr1:EGFP)<sup>s843</sup>* (blue),  
64 junctions are labeled by Zo-1 (red). Rasip1 proteins is not detectable in *rasip1<sup>ubs28</sup>*  
65 mutants. Scale bars, 5  $\mu$ m.

66  
67 **S-Figure 2: ISV sprouting is affected in *rasip1* mutants.** (a) Still pictures of time-  
68 lapse movies (s-movies 1, 2) showing ISV sprouting in wild-type and *rasip1<sup>ubs28</sup>*  
69 embryos between 27 and 30 hpf. Scale bars, 20  $\mu$ m. (b) Quantification of incomplete  
70 ISVs at 30 hpf (WT  $n=8$  embryos, mut  $n=21$ ). Median value: WT=0, mut=25%.  
71 Sprouting ISVs showing incomplete growth were counted and divided by the total ISV  
72 number per embryo. (unpaired two-tailed Mann Whitney test and error bars indicate  
73 standard deviation; significance: \* $p < 0.1$ ) (c) Proportion of ISVs of different cell  
74 numbers at 30 hpf (WT  $n=12$  embryos, 58 ISVs; mut  $n=12$ , 60). Unpaired two-tailed  
75 Mann Whitney test and error bars indicate standard deviation; significance: \*\*\* $p <$   
76 0.001 (d) Cell division rates from 24 to 30 hpf are decreased in *rasip1<sup>ubs28</sup>* compared  
77 to wild-type. Embryos were analyzed by Fisher exact test:  $p=0.0316$ . (e, f) Still-

78 pictures of time-lapse (s-movies 3-6) analysis showing endothelial cell proliferation  
79 and movements (visualized by nuclear EGFP) in wild-type and *rasip1<sup>ubs28</sup>* embryos.  
80 *rasip1* mutants show reduced cell proliferation within the sprout. Reduced cell number  
81 may be partially compensated by migration of additional cells into the sprout (f). Scale  
82 bars, 5  $\mu$ m. **(g)** Quantification of time-lapse analyses on the relative contribution (%)  
83 of cell migration and proliferation to ISVs of different cell content. The ratio of cells  
84 from divisions and cells originated from the DA were quantified in *rasip1<sup>ubs28</sup>* compared  
85 to wild-type (WT  $n=4$ , mut  $n=5$ ).

86

87 **S-Figure 3: Re-localization of Pecam1-EGFP from the apical region during**  
88 **anastomosis.** Still images from time-lapse movies (s-movies 12, 13) with high spatial  
89 and temporal resolution (hh:mm) from a movie of a PECAM-EGFP expressing embryo  
90 *Tg(fli1a:Pecam-EGFP)<sup>ncv27</sup>*. Junctions were imaged in the DLAV from 32 hpf onwards.  
91 Scale bar, 5  $\mu$ m.

92

93 **S-Figure 4: Dynamic distribution of Rasip1 during vascular development. (a-e)**  
94 Immunofluorescence of Rasip1 and Zo-1 in different developmental stages. Rasip1  
95 protein is specifically expressed in the developing vasculature, visible in the DA at 24  
96 hpf (a) and then in sprouting endothelial cells at 28 hpf (yellow arrowheads) (b).  
97 Expression in the DA is lost at 30 hpf (c). Rasip1 is apically localized at 30-32 hpf  
98 (yellow arrowheads) and also detectable at endothelial cell junctions at 48 hpf (white  
99 arrowheads in zoom-in). Scale bar, 20  $\mu$ m.

100

101 **S-Figure 5: Loss of *rasip1* does not strongly affect apical polarization of**  
102 **endothelial cells. (a)** Live images showing localization of EGFP-Podocalyxin (EGFP-

103 Podxl) in the luminal cell membrane at 32 and 48 hpf. Scale bars, 20  $\mu\text{m}$ . **(b)** Live  
104 images showing EGFP-Podxl in wild-type and *rasip1<sup>ubs28</sup>* embryos. *rasip1<sup>ubs28</sup>* mutants  
105 show local luminal constrictions (see inset z-projections). EGFP-Podxl is apically  
106 restricted in *rasip1<sup>ubs28</sup>* mutants but appears more irregular in its distribution. Scale  
107 bars, 20  $\mu\text{m}$  (overview) and 5  $\mu\text{m}$  (inset).

108

109 **S-Figure 6: Loss of *radil-b* enhances lumen defects and blood-flow of *rasip1***  
110 **mutants. (a)** Phylogenetic tree based on the alignment of the entire protein sequences  
111 of human, mouse and zebrafish *rasip1* and *radil*. There are three *radil* paralogues in  
112 zebrafish. Numbers at branch points present bootstrap values. Zebrafish Radil-a has  
113 much closer relationship with regard to its mouse and human homologue based on  
114 protein-protein interaction databases. Radil-b and Radil-c were newly identified in this  
115 study and annotated from organism-specific databases. **(b)** A nonsense mutation in  
116 exon 2 of *radil-b<sup>sa20161</sup>* mutants ablates the Ras association (RA) domain, the dilute  
117 (DIL) domain (Rasip1 binding site) and the PDZ domain. **(c)** Quantification of cranial  
118 brain hemorrhage in *rasip1<sup>ubs28</sup>*, *radil-b<sup>sa20161</sup>* and *rasip1<sup>ubs28</sup>; radil-b<sup>sa20161</sup>* double  
119 mutants. **(d)** Quantification of luminal pockets from the still images of wild-type, single  
120 *rasip1<sup>ubs28</sup>* and *radilb<sup>sa20161</sup>* and *rasip1<sup>ubs28</sup>; radilb<sup>sa20161</sup>* double mutants at 32 hpf. The  
121 number of ISVs containing ectopic lumens is divided by the total number of ISVs  
122 analyzed per embryo (WT  $n=5$ , *rasip1<sup>ubs28</sup>* mut  $n=34$ , *radilb<sup>sa20161</sup>* mut  $n=21$ , *rasip1<sup>ubs28</sup>;*  
123 *radilb<sup>sa20161</sup>* mut  $n=8$ ). **(e-g)** Quantification of blood flow defects in ISVs at 48, 72 and  
124 120 hpf in *rasip1<sup>ubs28</sup>*, *radilb<sup>sa20161</sup>* and in double mutants. *radilb<sup>sa20161</sup>* mutants show  
125 only transient defects in blood flow at 48 hpf. *rasip1<sup>ubs28</sup>;radilb<sup>sa20161</sup>* double mutants  
126 show a strongly enhanced phenotype. Number of embryos and ISVs analyzed at 48,  
127 72 and 120 hpf, respectively: WT (4, 44; 5, 71; 6, 87), *rasip1<sup>ubs28</sup>* (12, 176; 8, 119; 10,

128 118), *radilb*<sup>sa20161</sup> (9, 105; 8, 78; 5, 41) and double mutant (5, 56; 10, 102; 6, 55).  
129 Analyzed by unpaired two-tailed Mann Whitney test and error bars indicate standard  
130 deviation; significance (ns=no significance, \*p < 0.1, \*\*p < 0.01, \*\*\*p < 0.001, \*\*\*\*p <  
131 0.0001). **(h)** Live images showing EGFP-Podxl in *radilb*<sup>sa20161</sup> and  
132 *radilb*<sup>sa20161</sup>;*rasip1*<sup>ubs28</sup> double mutants displaying luminal constrictions at 48 hpf.  
133 Insets show digital cross sections of the ISV. Scale bars, 20 μm (overview) and 5 μm  
134 (inset).

135

136 **S-Figure 6: Vascular defects in *heg1* and *ccm1* morphants.** **(a)** At 72 hpf, *heg1*  
137 morphants show pericardial edema. Scale bar, 500 μm. **(b)** At 72 hpf, cranial brain  
138 hemorrhages are observed in *ccm1* and *heg1* MO injected embryos with higher  
139 incidence when compared to control MO injected embryos. **(c)** Quantification of  
140 incompletely sprouting ISVs at 30 hpf (control MO injected embryos *n*=6, *ccm1* MO  
141 *n*=6, *heg1* MO *n*=7). **(d)** The number of cells per ISV and DLAV at 30 hpf (Control MO  
142 injected embryos *n*=8, *ccm1* MO *n*=9, *heg1* MO *n*=5). **(e)** *In vivo* still images using VE-  
143 cad-VENUS and Pecam-EGFP as junctional reporters at 32 hpf. Scale bars, 20 μm.  
144 Analyzed by unpaired two-tailed Mann-Whitney test and error bars indicate standard  
145 deviation; significance (ns=no significance, \*p < 0.1, \*\*p < 0.01).

146

147 **Supplementary Movie legends**

148 **Supplementary Movie 1:** (S-Figure 2a) Confocal time-lapse movie of ISV formation  
149 (24-30 hpf) in wild-type embryos. Endothelial cells are labeled by  $TG((kdr1:EGFP)^{s843})$   
150 (inversed contrast). Scale bar, 50  $\mu\text{m}$ .

151

152 **Supplementary Movie 2:** (S-Figure 2a) Confocal time-lapse movie of ISV formation  
153 (24-30 hpf) in  $rasip1^{ubs28}$  embryos. Endothelial cells are labeled by  $TG((kdr1:EGFP)^{s843})$   
154 (inversed contrast). Compared to wild-type,  $rasip1^{ubs28}$  mutants display  
155 unsynchronized and disrupted angiogenetic sprouting. Scale bar, 50  $\mu\text{m}$ .

156

157 **Supplementary Movies 3-6:** (S-Figure 2e, f) Confocal time-lapse movie of ISV  
158 formation from 24 hpf in wild-type (s-mov3 and 5) and  $rasip1^{ubs28}$  (s-mov4 and 6)  
159 embryos. Endothelial cells are labeled by  $Tg(fliep:gal4ff)^{ubs3}; (UAS:mRFP)$  in red and  
160 nuclei are labeled by  $Tg(kdr1:EGFPnls)^{ubs1}$  in green. Scale bar, 20  $\mu\text{m}$ .

161

162 **Supplementary Movie 7:** (Figure 3a) Confocal time-lapse movie of ISV formation (30-  
163 48hpf) in wild-type embryos. Endothelial cell junctions are labeled by VE-cad-Venus  
164 ( $Tg(cdh5:cdh5-TFP-TENS-Venus)^{uq11bh}$ ) and imaged 1frame/h (reverse contrast).  
165 Scale bar, 50  $\mu\text{m}$ .

166

167 **Supplementary Movie 8:** (Figure 3a) Confocal time-lapse movie of ISV formation (30-  
168 48hpf) in  $rasip1^{ubs28}$  embryos. Endothelial cell junctions are labeled by VE-cad-Venus  
169 ( $Tg(cdh5:cdh5-TFP-TENS-Venus)^{uq11bh}$ ) and imaged 1frame/h (reverse contrast).  
170 In  $rasip1^{ubs28}$  mutants, collapsed junctions and VE-cadherin junction disconnections  
171 from the DA were observed. Scale bar, 50  $\mu\text{m}$ .

172 **Supplementary Movies 9-11:** (Figure 3a-c) Confocal time-lapse movie of  
173 anastomotic ring formation in a wild-type(s-mov 9) and two *rasip1<sup>ubs28</sup>* mutant (s-mov  
174 10, 11) embryos from 32hpf. Endothelial cell junctions are labeled by VE-cad-Venus  
175 (*Tg(cdh5:cdh5-TFP-TENS-Venus)<sup>uq11bh</sup>*) (reverse contrast). Scale bar, 20  $\mu\text{m}$ .

176

177 **Supplementary Movies 12 and 13:** (S-Figure 3) Confocal time-lapse movie showing  
178 dynamic re-localization of Pecam-EGFP (*Tg(fli1a:pecam1-eGFP)<sup>ncv27</sup>*) during  
179 anastomosis in a wild-type (s-mov 12) and *rasip1<sup>ubs28</sup>* mutant (s-mov 13) embryo,  
180 starting at 32 hpf and recorded at 1 frame/min (00:00 to 00:43) In the *rasip1<sup>ubs28</sup>*  
181 mutant, a defect in the clearance of apical junctional proteins was observed. Scale  
182 bars, 5  $\mu\text{m}$ .

183

184 **Supplementary Movies 14 and 15:** (Figure 4a) Confocal time-lapse movie showing  
185 lumen formation and the onset of blood circulation in a wild-type (s-mov 14) and  
186 *rasip1<sup>ubs28</sup>* mutant (s-mov 15) embryo starting at 32 hpf. Endothelial cells are labeled  
187 by EGFP (*Tg(kdr1:EGFP)<sup>s843</sup>*; blood cell are labeled by DsRed *Tg(gata1:DsRed)<sup>sd2</sup>*. In  
188 *rasip1<sup>ubs28</sup>* mutants blood circulation in the ISV and DLAV is delayed. Scale bars, 5  
189  $\mu\text{m}$ .

190

191 **Supplementary Movies 16 and 17:** (Figure 5a) Confocal time-lapse movie of ISV  
192 formation (24-30 hpf) in a wild-type (s-mov 16) and a *rasip1<sup>ubs28</sup>* mutant (s-mov 17)  
193 embryo. Endothelial cells are labeled by *Tg((kdr1:EGFP)<sup>s843</sup>* (inversed contrast). Only  
194 the *rasip1<sup>ubs28</sup>* mutant shows formation of local lumens. Scale bar, 50  $\mu\text{m}$ .

195



196 **Supplementary Movies 18-21:** (Figure 5d) Confocal time-lapse movie showing  
197 lumen formation in the ISV and DLAV from 34 hpf onwards in a wild-type embryo (s-  
198 mov 18 and 19) and *rasip1<sup>ubs28</sup>* mutant (s-mov 20 and 21) embryos. s-movies 18 and  
199 20: Endothelial cells are labeled by cytoplasmic RFP (*Tg(fliep:gal4ff)<sup>ubs3</sup>*;  
200 (*UAS:mRFP*)). Images were taken every 6 mins. (inverse contrast). Scale bars, 20  
201  $\mu$ m. s-movies 19 and 21: The same movie as s-movies 18 and 20, respectively  
202 showing merged channels: endothelial cells: red (*UAS:mRFP*); endothelial cell  
203 junctions: green (VE-cad-Venus) (*Tg(cdh5:cdh5-TFP-TENS-Venus)<sup>uq11bh</sup>*)  
204
